# Supplementary material
Source: PubMed Central journal article supplement (PMC10394691)

# Supplementgatory figure 1

**A**

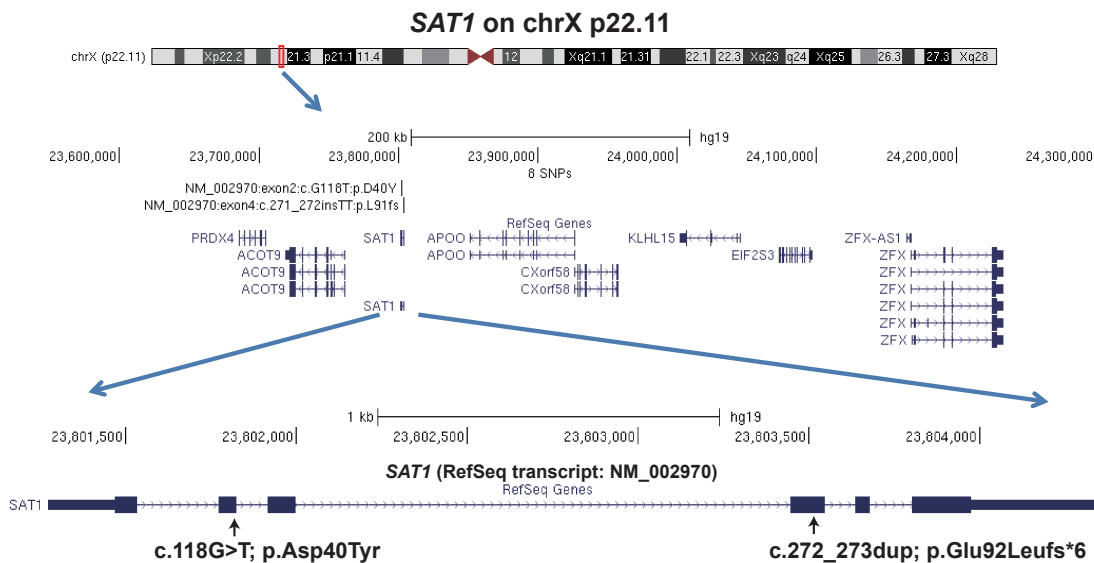

**B**

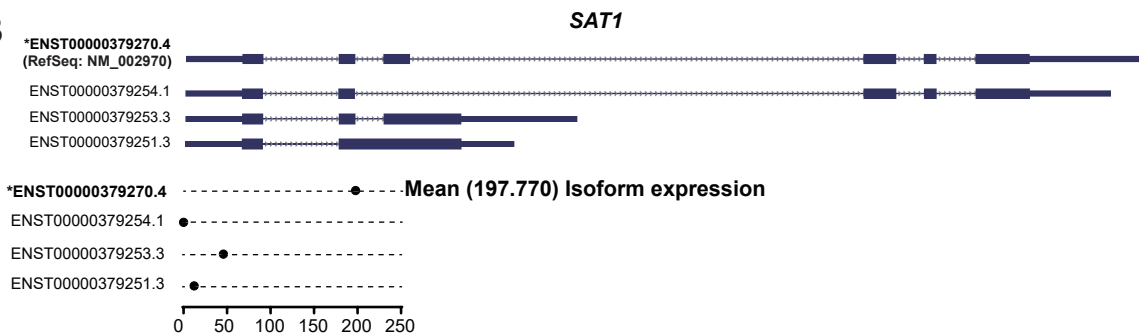

**C**

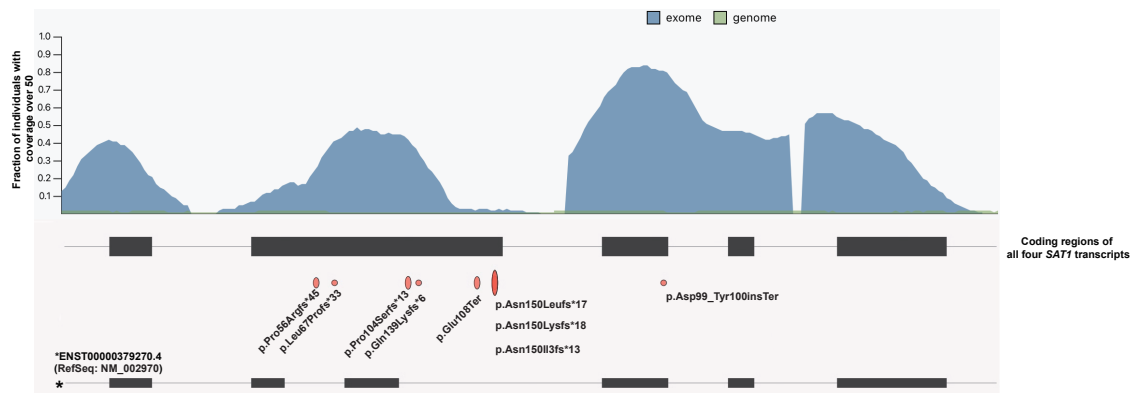

**D**

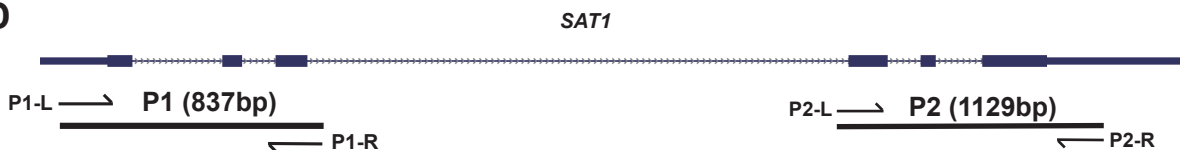

# Supplementary figure 2

**A**

p.Asp40Tyr  
↓

|              |   |   |   |   |   |   |   |   |   |   |   |   |   |
|--------------|---|---|---|---|---|---|---|---|---|---|---|---|---|
| Human        | M | E | E | Q | V | I | L | T | E | K | D | G | T |
| Rhesus       | M | E | E | Q | V | I | L | T | E | K | D | G | T |
| Mouse        | M | E | D | Q | V | I | L | T | E | K | D | G | T |
| Dog          | R | E | G | Q | V | I | L | T | E | K | D | G | T |
| Elephant     | M | E | E | K | V | R | L | T | E | K | D | G | T |
| Chicken      | M | E | D | Q | V | V | L | T | E | K | D | G | T |
| X_tropicalis | M | E | N | Q | V | V | L | T | E | K | D | G | T |
| Zebrafish    | M | E | D | Q | V | L | L | T | E | K | D | G | T |

p.Glu92Leufs\*6  
↓

|              |   |   |   |   |   |   |   |   |   |   |   |   |   |
|--------------|---|---|---|---|---|---|---|---|---|---|---|---|---|
| Human        | P | W | I | G | K | L | L | Y | L | E | D | F | F |
| Rhesus       | P | W | I | G | K | L | L | Y | L | E | D | F | F |
| Mouse        | P | W | I | G | K | L | L | Y | L | E | D | F | F |
| Dog          | P | W | I | G | K | L | L | Y | L | E | D | F | F |
| Elephant     | P | W | I | G | K | L | L | Y | L | E | D | F | F |
| Chicken      | P | W | I | G | K | L | L | Y | L | E | D | F | F |
| X_tropicalis | P | W | I | G | K | L | L | Y | L | E | D | F | F |
| Zebrafish    | P | W | I | G | K | L | L | Y | L | E | D | F | F |

**B**

Computational prediction

|            | SIFT        | Polyphen2   | fathmm-MKL  | LRT         | MutationTaster | MutationAssessor       | PROVEAN     | MetaSVM     |
|------------|-------------|-------------|-------------|-------------|----------------|------------------------|-------------|-------------|
| p.Asp40Tyr | Deleterious | Deleterious | Deleterious | Deleterious | Deleterious    | High functional impact | Deleterious | Deleterious |

# Supplementary figure 3

## A

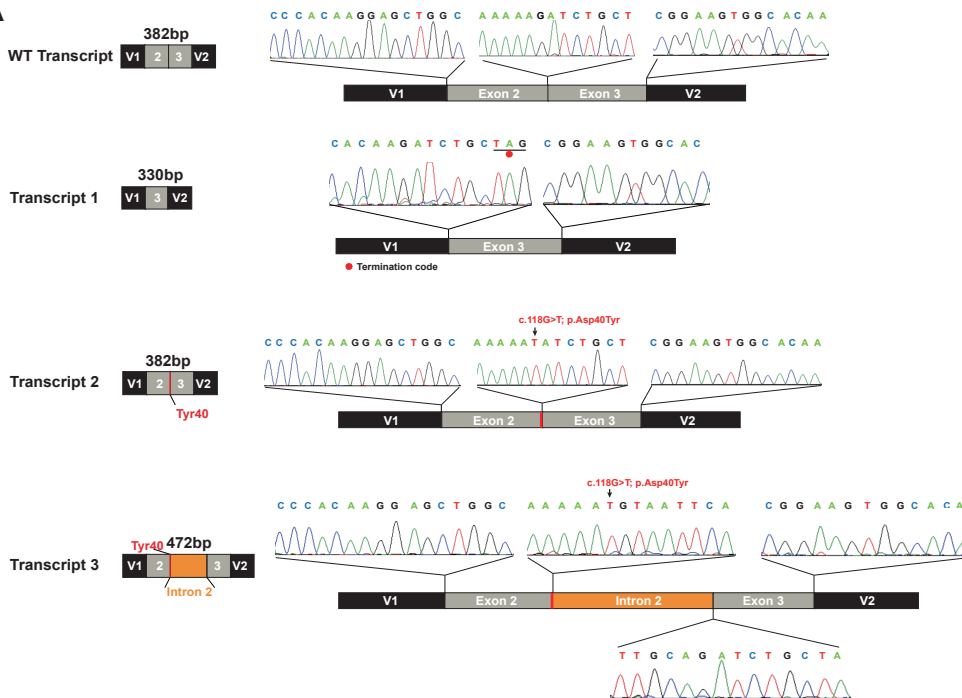

## B

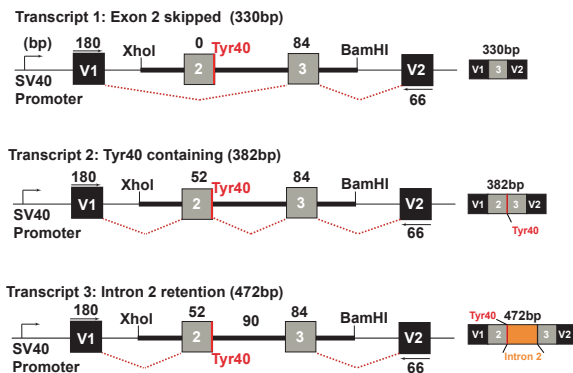

## C

SSAT Protein Model (Homo-dimer)

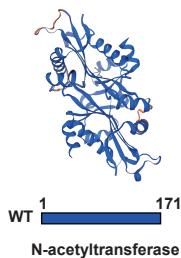

Transcript 1: Exon 2 skipped (Stop gain)

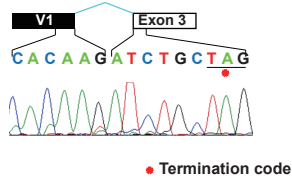

Transcript 2: Tyr40 containing

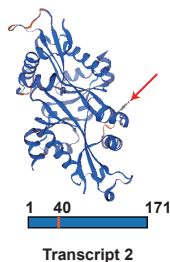

Transcript 3: Intron 2 retention

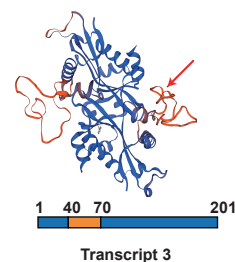

# Supplementary figure 4

**A**

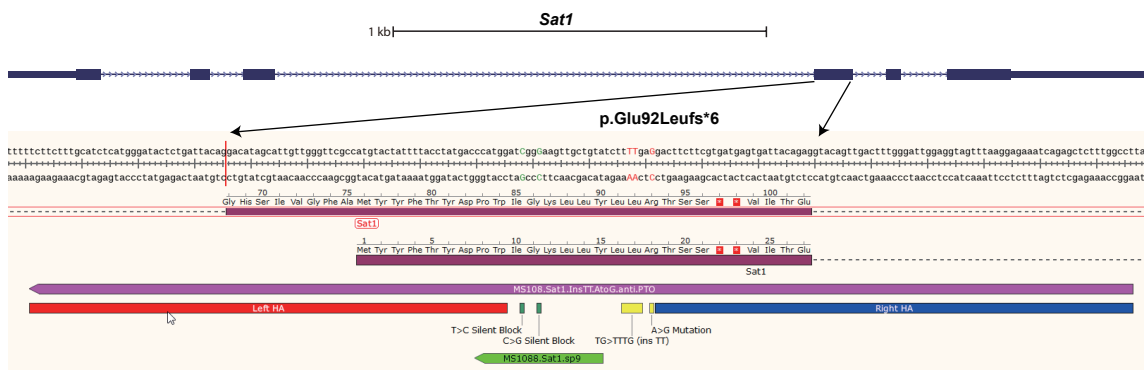

**B**

|                 | Strand | Chr   | Position (mm9) | Mismatch nt | Target     |
|-----------------|--------|-------|----------------|-------------|------------|
| MS1088.Sat1.sp9 | +      | chrX  | 155214068      | None        | Target     |
| MS1088.Sat1.sp9 | +      | chr17 | 16320764       | 5:T>C       | Intergenic |
| MS1088.Sat1.sp9 | +      | chr5  | 29794769       | 5:T>C       | Intergenic |

**C**

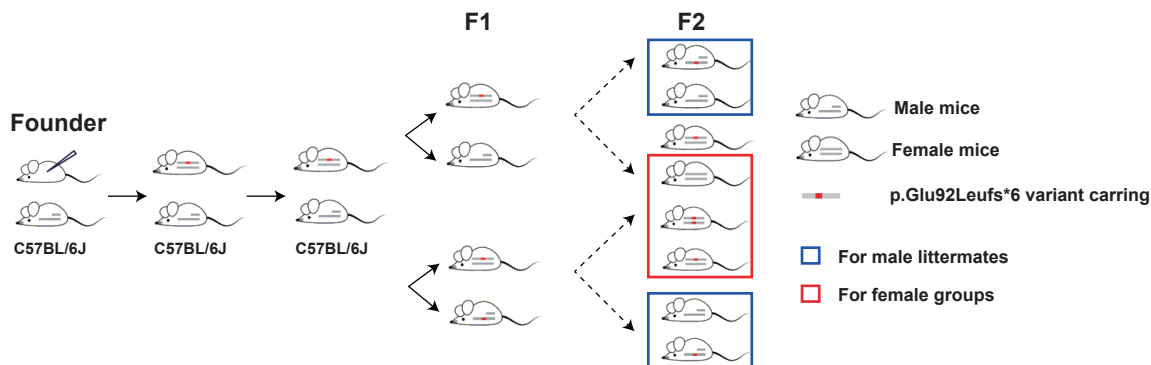

**D**

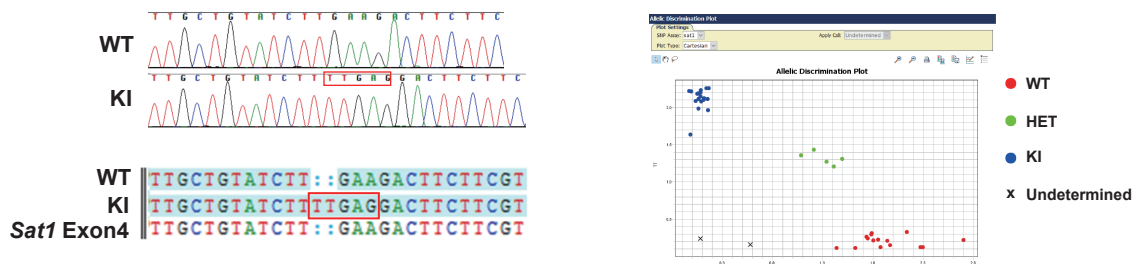

**E**

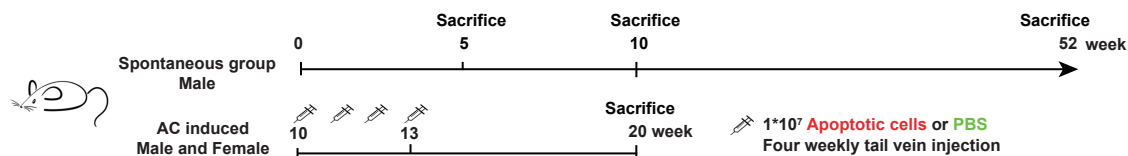

# Supplementary figure 5

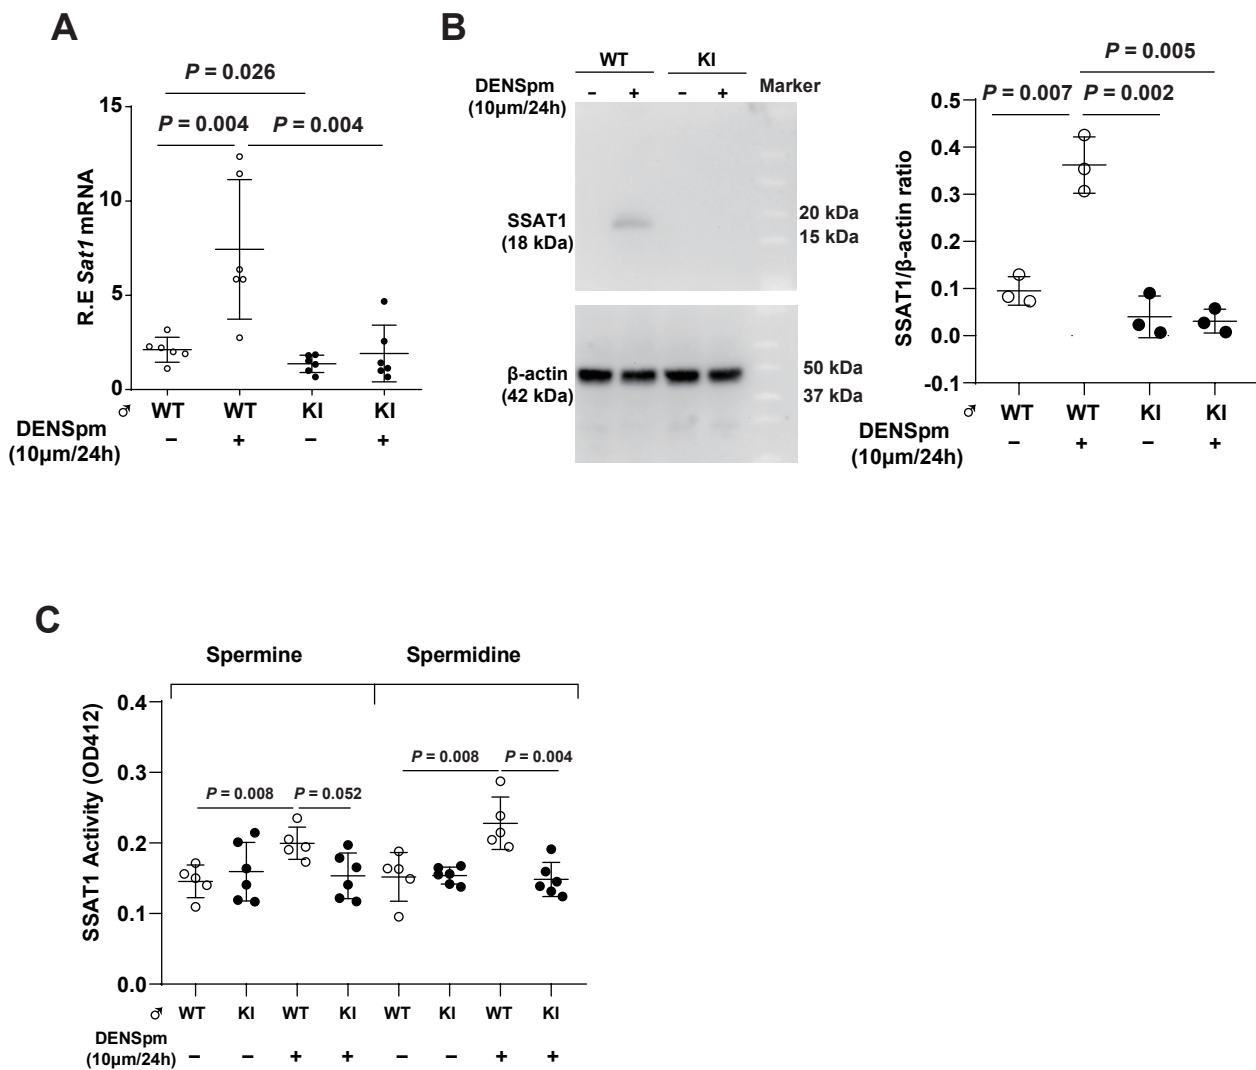

# Supplementary figure 6

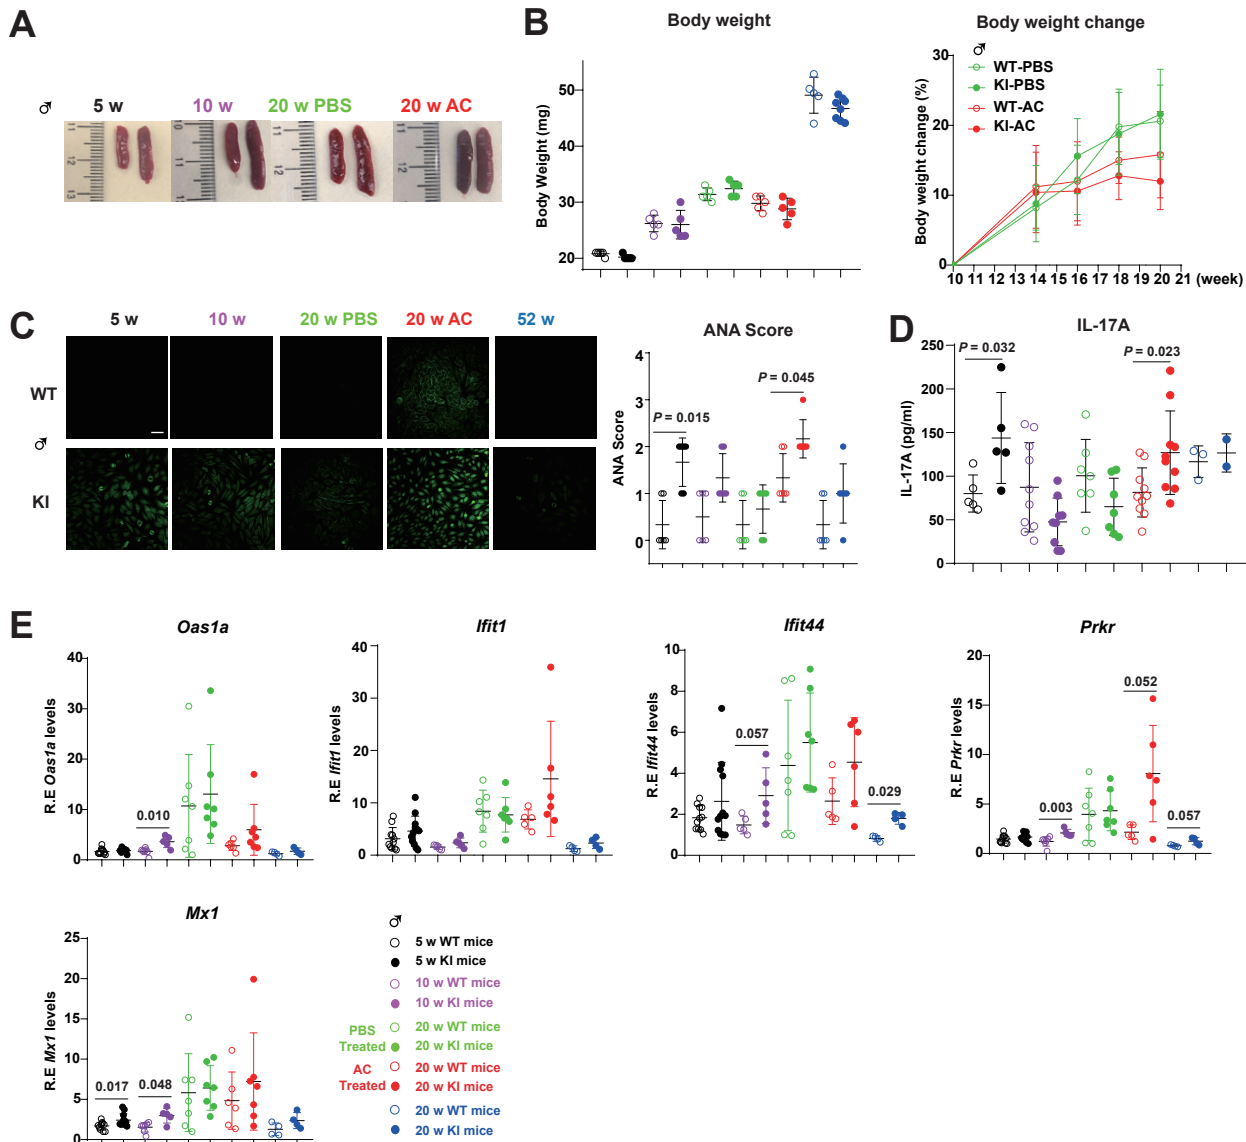

# Supplementary figure 7

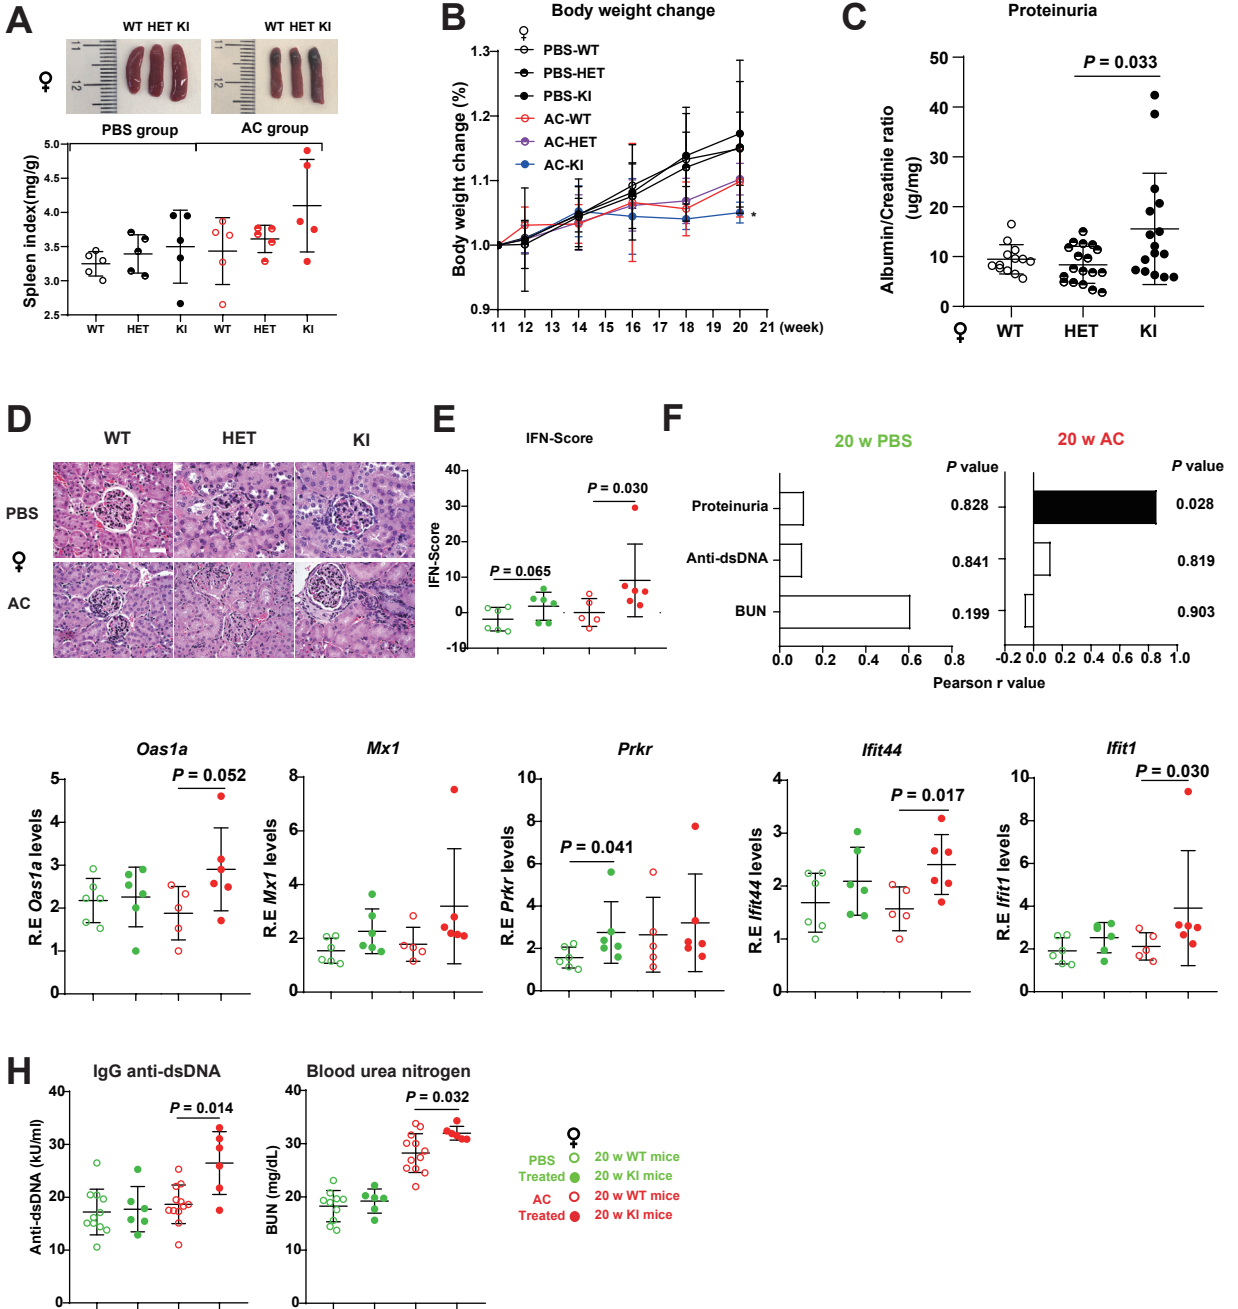

# Supplementary figure 8

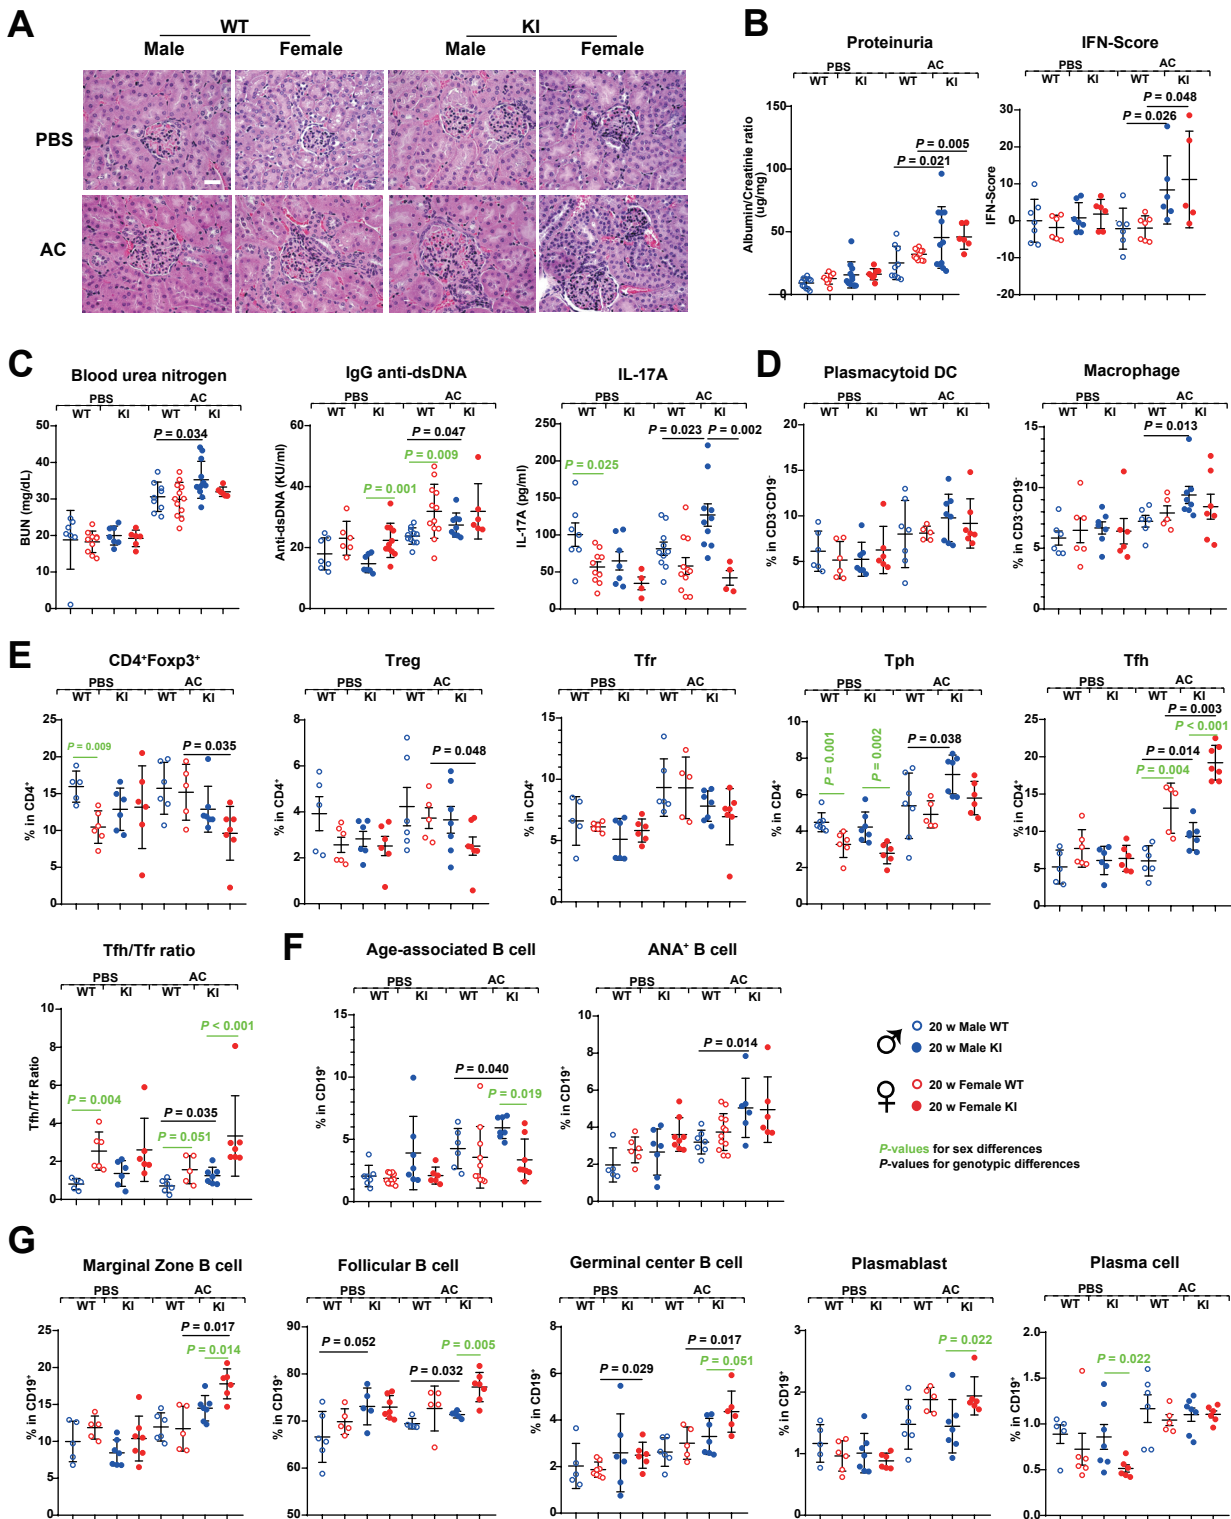



# Supplementary figure 9

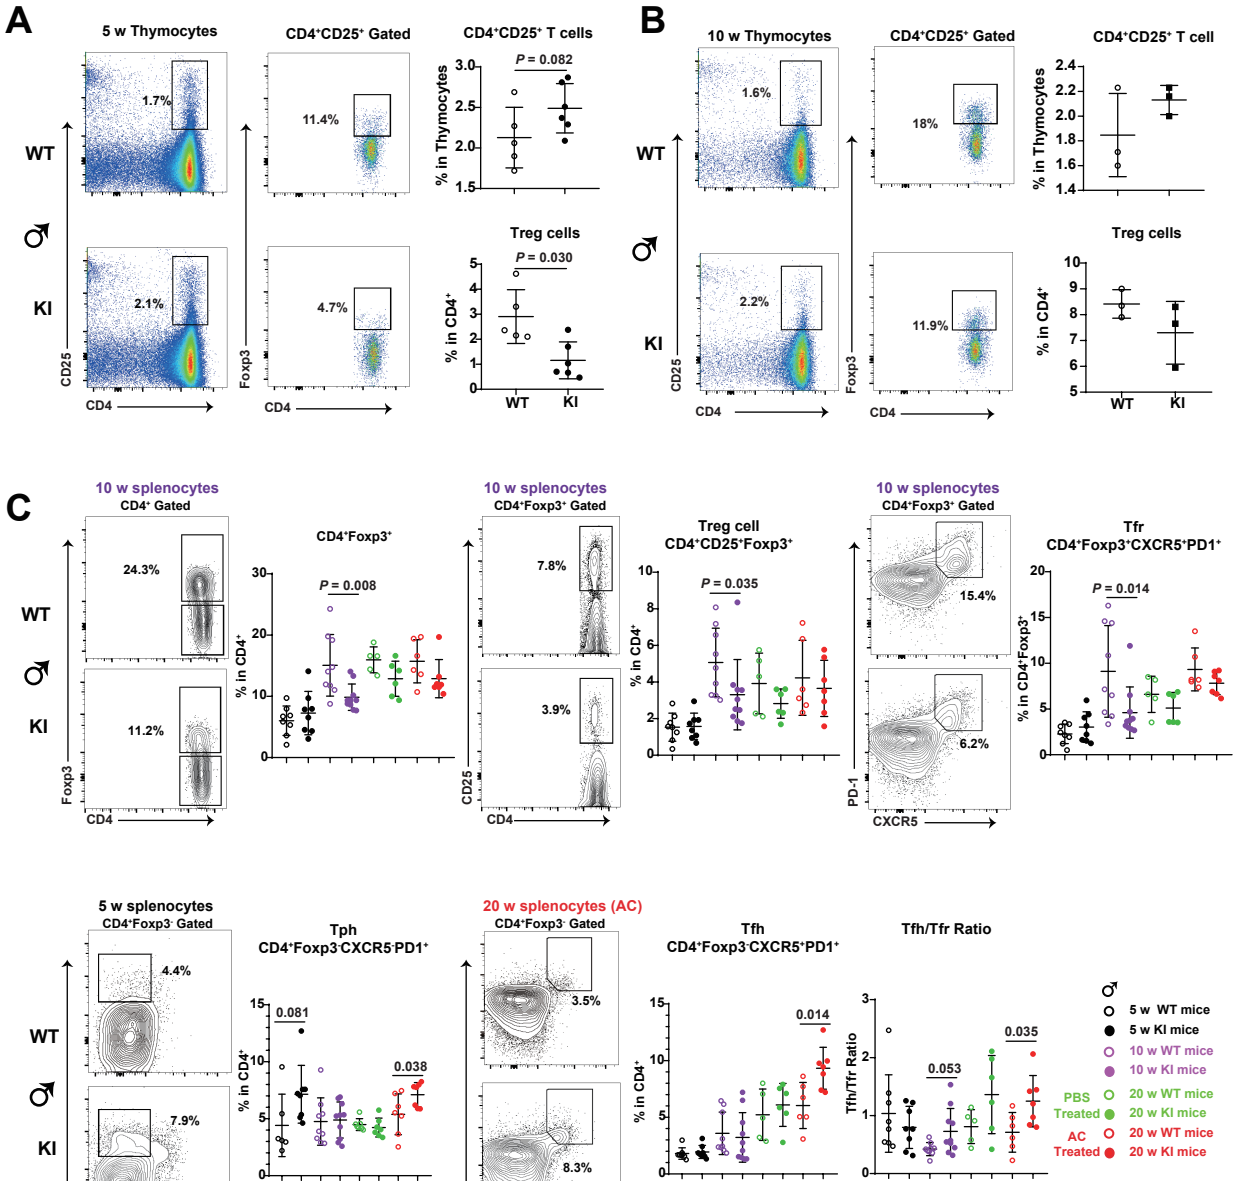

# Supplementary figure 10

## A

Gene: **Sat1 (C57BL/6J)**

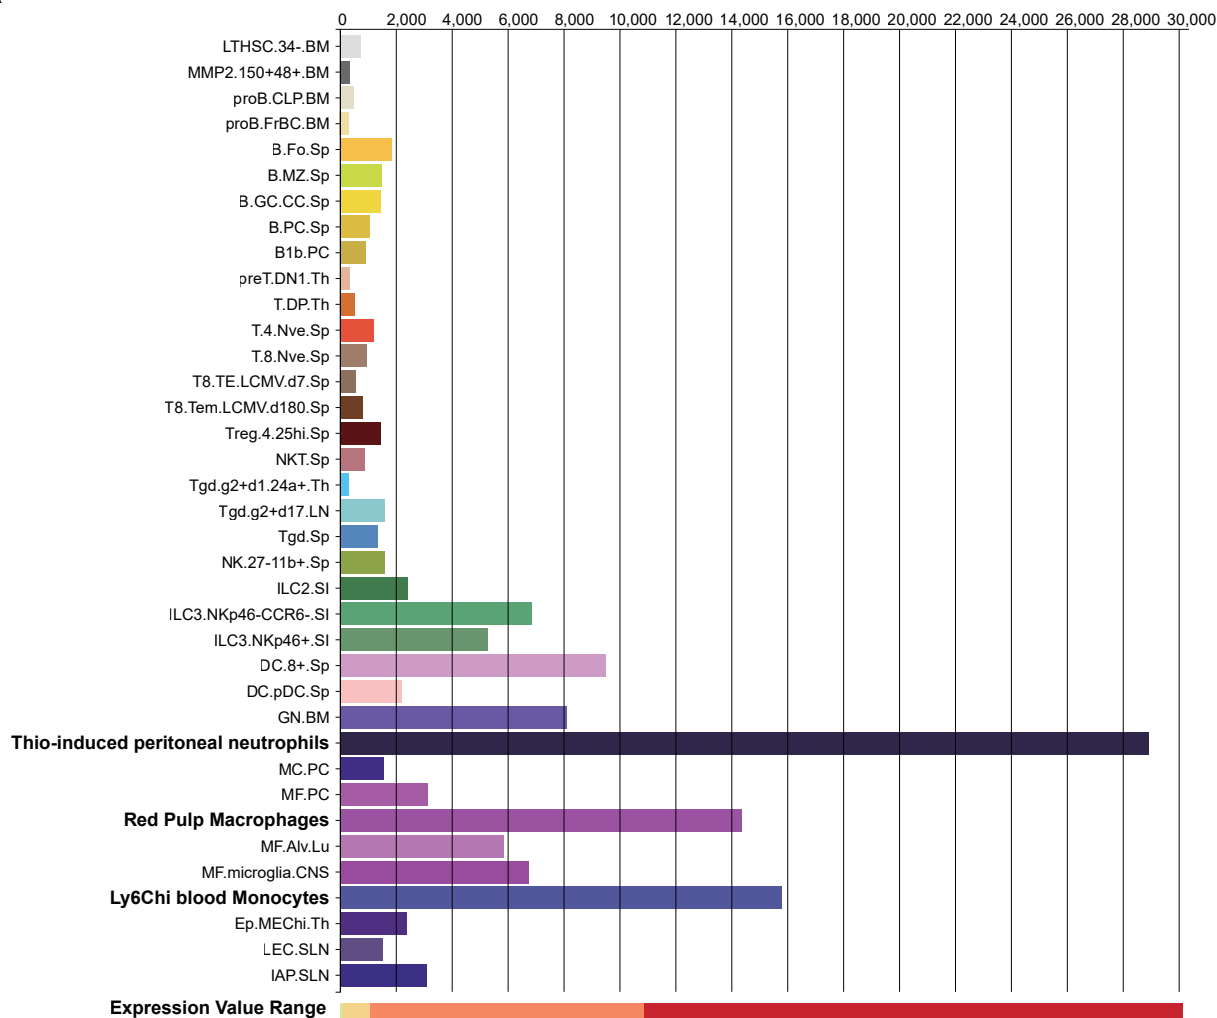

## B

Consensus dataset<sup>1</sup>

RNA cell type specificity: Cell type enhanced (neutrophil)

Lineage Expression Alphabetical

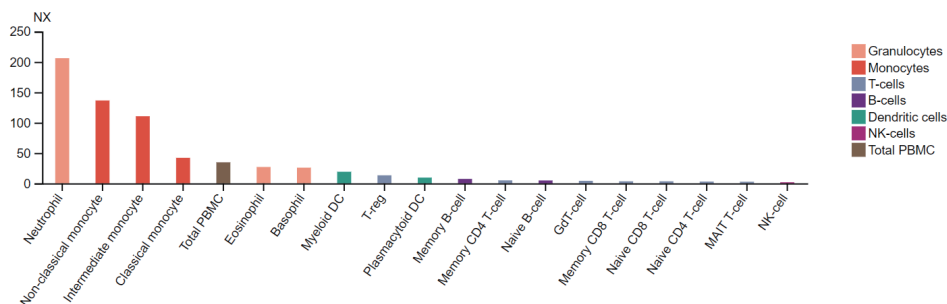

Supplement: NIHMS1829042-supplement-Supp2.pdf [file NIHMS1829042-supplement-Supp2.pdf]
