# Supplementary material
Source: PubMed Central journal article supplement (PMC10394691)
Supplement: NIHMS1829042-supplement-Supp1.pdf [file NIHMS1829042-supplement-Supp1.pdf]

## Supplementary Materials for

### Loss-of-function variants in *SAT1* cause X-linked Childhood-onset Systemic Lupus Erythematosus

Lingxiao Xu<sup>1,2†</sup>, Jian Zhao<sup>1†</sup>, Qing Sun<sup>1†</sup>, Lei Wang<sup>1</sup>, Xue Xu<sup>1</sup>, Ting Liu<sup>10</sup>, Yunjuan Wu<sup>2</sup>,  
Jingfeng Zhu<sup>11</sup>, Linyu Geng<sup>1</sup>, Yun Deng<sup>1</sup>, Alexander Awgulewitsch<sup>12</sup>, Diane L. Kamen<sup>1</sup>, Jim  
C. Oates<sup>1,8</sup>, Prithvi Raj<sup>3</sup>, Edward K. Wakeland<sup>3</sup>, R. Hal Scofield<sup>4,5</sup>, Joel M. Guthridge<sup>4,6</sup>,  
Judith A. James<sup>4,6</sup>, Bevra H Hahn<sup>13</sup>, Deborah K. McCurdy<sup>7</sup>, Fang Wang<sup>9</sup>, Miaoja Zhang<sup>2</sup>,  
Wenfeng Tan<sup>2</sup>, Gary S. Gilkeson<sup>1,8</sup>, Betty P. Tsao<sup>1\*</sup>.

†These authors contributed equally to this work

\*Correspondence to: Email: tsaob@musc.edu (B.P.T.)

#### **This file includes:**

Materials and Methods

Supplementary Figures 1 to 10

Supplementary Tables 1 to 14

References

## **Materials and Methods**

### **Whole exome sequencing and bioinformatics analysis**

Genomic DNA was extracted from peripheral blood and processed using the Illumina TruSeq kit (Illumina, San Diego, CA, USA). Exome capture was performed using the TruSeq Exome Enrichment Kit, which targets ~62 Mb of the protein-coding and regulatory sequence of 20,794 genes in the human genome according to the manufacture's manual. The enriched libraries were size-checked and quantitated using the Agilent 2100 BioAnalyzer, and then subjected to 2x100 bp paired-end massively parallel sequencing using the Illumina HiSeq2000 sequencing system (Illumina, San Diego, CA, USA). Sequence reads were trimmed using Trimmomatic v0.36<sup>1</sup> and aligned to the GRCh37 human reference sequence using BWA-MEM v0.7.15<sup>2</sup>. Duplicate reads were marked and removed using Picard v2.9.0 (<https://broadinstitute.github.io/picard/>). Final alignments were generated after local indel realignment and base quality score recalibration using the Genome Analysis Toolkit (GATK) v3.7<sup>3</sup>. Variant calling and coverage analyses were carried out using GATK v3.7 and Samtools v1.3.1<sup>4</sup>. All detected variants were annotated using ANNOVAR v2017Jul16<sup>5</sup>. Only variants in protein-coding region and splice site variants were considered for further analysis. Variants with a minor allele frequency higher than 1% in the general population or any subpopulation in the Genome Aggregation Database (gnomAD) and 1000 Genomes Project were excluded. Variants were prioritized based on the transmission pattern (X-linked, autosomal recessive and de novo) and the predicted functional impact.

### ***SAT1* Sanger sequencing**

To confirm the two rare variants in the two whole-exome sequenced families and to explore additional rare *SAT1* variants among SLE patients (a total of 562 SLE patients enriched in multiplex male lupus and pediatric patients), we used primer sets to PCR the Amplicon #1 (837bp) and Amplicon # 2 (1129bp) that covers 5'UTR to exon 1-3 region and exon 4-6 to 3'UTR region of *SAT1*, respectively (online supplementary figure 1D). Subsequently, the two resulting PCR products were resolved in an 1.5% agarose gel to purify the PCR products

using Zymoclean Gel DNA Recover Kit (Zymo Research) for standard Sanger sequencing (GENEWIZ). Primer sequences are shown in online supplementary table 11.

### **In silico functional studies**

SIFT (Sorting Intolerant From Tolerant; <http://sift.bii.a-star.edu.sg/>), PolyPhen-2 (Polymorphism Phenotyping v2; <http://genetics.bwh.harvard.edu/pph2/>), LRT (Likelihood Ratio Test Query; <http://www.genetics.wustl.edu/>), PROVEAN (Protein Variation Effect Analyzer; <http://provean.jcvi.org/>), Meta-SVM (meta-analytic support vector machine; <https://omictools.co/metasmv-tool/>), Mutation Taster (<http://www.mutationtaster.org/>), Mutation Assessor (<http://mutationassessor.org/>) and FATHMM (Functional Analysis through Hidden Markov Models; <http://fathmm.biocompute.org.uk/>) were used to predict the functional effects that the *SAT1* missense variant (p.Asp40Tyr) may have on protein function. To evaluate the potential pathogenicity of the splice site variation, Human Splice Finder V3.1 (<http://www.umd.be/HSF3/>), an in-silico splice site prediction program, was used to analyze whether the variants (p.Asp40Tyr and rs900361022) could cause changes to the splice sites. We used the gene name of *SAT1* and mutants as input for the analysis. p.Asp40Tyr was predicted to result in a “Broken WT Donor site” and rs900361022 was predicted to result in a “Broken Branch Point site”, which mean that the variants likely affect splicing.

### **Minigene assay**

This assay is based on a modified protocol described<sup>6</sup>. Briefly, genomic DNA fragment containing either the Tyr40 or Asp40 *SAT1* variant encompassing all of intron 1, exon 2, intron 2, exon 3 and intron, was amplified and cloned into the XhoI and BamHI site of the exon trapping vector pET01 (Boca scientific).

After Sanger sequencing to confirm the purified DNA construct contains the correct content and orientation, either the wild-type or the mutant mini-gene construct was transfected into the 293T and HeLa cell lines using FuGene 6 transfection reagent (Promega) following manufacturer’s instructions.

Total RNA from exon trapping construct-transfected 293T and HeLa cells were reverse-transcribed and PCR-amplified. The resulting RT-PCR products from WT and mutant minigenes were visualized by gel electrophoresis, and their sequence composition was determined by Sanger sequencing (GENEWIZ). Primer sequences are shown in online supplementary table 14.

### **Structural model.**

The molecular structure of human SSAT1 was retrieved from the Protein Data Bank (<https://www.rcsb.org/>) code PDB 2B5G5<sup>7</sup>. The transcripts 1, 2 and 3 of *SAT1* caused by p.Asp40Tyr were then submitted to the SWISS-MODEL server (<https://swissmodel.expasy.org/>) for model building.

### **Mice**

The *Sat1*<sup>p.Glu92Leufs\*6</sup> mouse was generated by CRISPR/Cas9-based gene manipulation in C57/BL6J (B6; Jackson Laboratory) mice at the MUSC Transgenic and Genome Editing Core and was backcrossed with C57BL/6J for at least two generations. Mice were maintained in specific-pathogen free conditions. Mouse experiments were performed according to governmental and institutional guidelines for animal welfare.

### **CRISPR/Cas9-mediated genome editing**

To determine the functional significance of p.Glu92Leufs\*6 mutation, we used CRISPR/Cas9-mediated genome editing to make a mouse model mirroring this TT duplication at the same position of mouse *Sat1*. Furthermore, to mimic the human mutant allele as closely as possible, we introduced a c.276A>G substitution in its mouse ortholog to yield a K93R substitution in the truncated protein, thus matching exactly the –LRTSS C-terminus of the mutant human *SAT1*. To protect against potential re-cutting of the already edited target sequence, two silent blocking mutations were introduced, i.e., c.255T>C and c.258C>G. The guide RNA (gRNA; tacagcaacttgccaatccangg) and single-stranded

oligonucleotide donor

(ssODN;tcttctttgcatctcatgggatactctgattacaggacatagcattgttgggttcgccatgtactattttacctatgacccatgga  
tCggGaagttgctgtatcttTTgaGgacttcttcgtgatgagtgattacagaggtagcttgactttgggattggaggtagtttaagga  
gaaatcagagctctttggcct) were designed and validated at the Genome Engineering and iPSC  
Center (GEiC), Washington University, St. Louis, MO and synthesized at Integrated  
Technologies, Inc (IDT); for design strategy and sequences, see online supplementary figure  
4A. To make functional gRNA, corresponding crRNA was annealed to tracrRNA (IDT) by  
combining 5  $\mu$ l of crRNA (1  $\mu$ g/ $\mu$ l) with 10  $\mu$ l of tracrRNA (1  $\mu$ g/ $\mu$ l) in a PCR tube for  
incubation in a thermocycler (95 °C for 5 min followed by ramp down to 25 °C at 5 °C/min)  
as described<sup>8</sup>; the resulting crRNA duplexes (gRNA) were stored at -70 °C until use.

Delivery of CRISPR reagents into single-cell C57BL/6J mouse embryos was performed by  
pronuclear injection of single-cell embryos essentially as described<sup>9</sup>. Prior to microinjection  
(MI), annealed MS1088.Sat.sp9 crRNA (12.5 ng/ $\mu$ l) was combined and complexed with Alt-  
R™ s.P. Cas9 nuclease (IDT) at a concentration of 25 ng/ $\mu$ l in MI buffer (10 mM Tris-HCl,  
pH 7.4; 0.25 mM EDTA) at room temperature for 10 min. Subsequently, the concentrations  
were adjusted by 5-fold dilution with MI buffer on ice and the addition of ssODN (50 ng/ $\mu$ l)  
(MS108.Sat1.InsTT/AtoG.anti.PTO); accordingly, the final concentrations in the MI cocktail  
were 2.5 ng/ $\mu$ l (sgRNA), 5 ng/ $\mu$ l (Cas9), and 10 ng/ $\mu$ l (ssODN). Successful targeting and  
faithful editing were achieved as determined by polymerase chain reaction and sequence  
analysis of DNA extracted from tail biopsies of pups derived from injected embryos.

### **Autoimmune mouse model**

For apoptotic thymocyte-induced autoimmune model, thymocytes from 10-week-old WT  
mice were collected, and single-cell suspensions were exposed to 2 mJ/cm<sup>2</sup>/s of radiation in a  
UVP lamp (CL-1000s, UK) followed by 2 h of incubation at 37 °C in RPMI 1640 plus 1%  
BSA (Gibco). Flow cytometry revealed that > 95% cells were apoptotic, as determined by  
annexin V and 7-amino-actinomycin D (7-AAD) staining (Biolegend). WT or *Sat1*<sup>p.Glu92Leufs\*6</sup>

variant mice were immunized with apoptotic thymocytes ( $10^7$  per mouse) through four weekly tail vein injections.

### **High-throughput colorimetric in vitro assay of SSAT1**

The assay is based on the protocol of Lin et al<sup>10</sup>. Briefly, liver homogenates of 5-week-old WT and KI male mice in 25mM tris-HCL and 0.5 mM EDTA, PH 7.5 (Sigma-Aldrich) were prepared using an ultrasonic homogenizer, adjusted to 25 µg/ml protein using a bicinchoninic acid (BCA) protein assay as the substrate. Substrate solution contained 50 mM Tris-HCl, 1 mM EDTA, 0.5 mM acetyl-CoA and variable concentrations of spermine/spermidine, pH7.5; enzyme solution contained 50 mM Tris-HCl, 1 mM EDTA and variable concentrations of enzyme, pH7.5; Ellman's reagent contained 50 mM Tris-HCl, 1 mM EDTA, 2 mM DTNB, pH7.5. Each reaction contained 25 µl enzyme solution mixed with 25 µl substrate solution in a 96-well microplate, reactions times were varied at 30°C and stopped by heating at 85°C for 5 min, cooled down to 4°C for 5 min, followed by addition of 50 µl Ellman's reagent, and kept at room temperature for 30 min. The released CoA was measured at OD412 nm with a BioTek plate reader.

### **RNA isolation and qPCR**

Total RNA was isolated from spleen single cells by Trizol reagent (Invitrogen) according to the standard protocols. cDNA was prepared by reverse transcription-PCR (RT-PCR) with High-Capacity cDNA Reverse Transcription Kit with RNase Inhibitor (Thermo Fisher) following manufacture's protocols. SYBR Green PCR Master Mix (Thermo Fisher) was used for quantitative PCR (qPCR) and each group was detected in triplicate. Primer sequences are shown in online supplementary table 11.

### **Western Blot**

Briefly, the harvested cells were washed twice with cold PBS, resuspended in RIPA buffer (Thermo Fisher) on ice for 30 min in the presence of complete Mini Protease Inhibitor tablet

(Roche), and then centrifuged (13,000g for 10 min at 4 °C). Protein concentration was estimated using the BCA Kit (Thermo Fisher) following the manufacturer's instructions. Each sample was separated on 12.5% sodium dodecyl sulfate–polyacrylamide gel electrophoresis (SDS-PAGE) (Thermo Fisher) and transferred to a polyvinylidene fluoride membrane (PVDF) (Thermo Fisher). After the membrane was blocked with 5% nonfat dry milk in Tris-buffered saline containing 0.1% Tween 20 (TBST) (Thermo Fisher), the membrane was incubated for with various primary antibodies specific for SSAT1 (61586, Cell Signaling Technology), LC3, p62, LAMP1 or  $\beta$ -actin (3700, Cell Signaling Technology) overnight at 4°C, respectively. After washing in TBST, the membranes were incubated for 1 h at room temperature with poly (HRP)-conjugated anti-rabbit or anti-mouse IgG (Thermo Fisher). The reaction products were visualized with a Super Signal West Pico PLUS Chemiluminescent Substrate (Thermo Fisher) and a Luminoimage analyzer (Fluor Chem R system). Protein expression was quantified by densitometric analysis with ImageJ software (NIH, USA).

### **Flow cytometric analysis**

Single-cell suspensions in MACS buffer (PBS, 1% FBS, 5mM EDTA) (eBioscience) were prepared before staining. Primary cells from mouse spleen or bone marrow mononuclear cells were first blocked with anti-mouse FC blocker (BD Bioscience) in phosphate buffered saline/0.5% bovine serum albumin/5mM EDTA for 10 minutes at 4°C, were incubated with various specific monoclonal antibodies. Cells were washed and re-suspended to the proper density with MACS buffer for LSRFortessa X-20 (BD Bioscience) analysis.

For surface staining, cells were isolated and analyzed by staining for 15 min at room temperature in PBS supplemented with 0.5% (v/v) human serum using the following fluorophore-conjugated antibodies in online supplementary table 10.

For intracellular transcription factor and cytokine staining, cells were fixed with Foxp3 Fix/Perm Buffer (eBioscience) washed with Perm Buffer (eBioscience) and stained with intracellular antibodies or stimulated by phorbol 12-myristate 13-acetate (PMA, Sigma) and

ionomycin (Sigma) and fixed with Intracellular (IC) Fixation Buffer (eBioscience), washed with Perm Buffer, and stained with antibodies in online supplementary table 10, respectively. For detection of cellular apoptosis, FITC Annexin V Apoptosis Detection Kit with 7-90HD (Biolegend) and CellTrace Kit (Invitrogen) were used, following the manufacturer's instructions. Cell acquisition was performed on LSR Fortessa X-20 (BD Bioscience), and data was analyzed using FlowJo software (Tree Star).

For detection of ANA<sup>+</sup> autoreactive B cells, they were performed similarly as described previously<sup>11,12</sup>. Briefly, nuclei from HeLa cells were isolated with the Nuclei EZ Lysis Kit (Sigma, St Louis, Mo), fragmented by vertexing with 0.5-mm cell disruption glass beads (Scientific Industries, Bohemia, NY), and biotinylated with EZ-Link-Sulfo-NHS-LC-biotin (Thermo Scientific, Waltham, Mass). Next, staining with 10 µl of biotinylated nuclear extract was done in 1.5% nonfat dry milk (Thermo Fisher) in HBSS (Gibco) or in permeabilization buffer for intracellular staining (eBioscience). The cells were spun down, resuspended, and stained for 15 minutes on ice with various specific monoclonal antibodies (BV421-conjugated streptavidin for biotinylated nuclear extract, Biolegend). The percent - age of allophycocyanin-positive cells in the streptavidin control was subtracted for each B-cell population to obtain the percentage of ANA<sup>+</sup> autoreactive B cells.

### **Detection and scoring of antinuclear autoantibodies (ANA)**

ANA was tested by immunofluorescence using human epithelial (Hep-2) cells on 12-well slides (Diasorin Inc). Mice sera were diluted 1:5 and one sample from a mouse with a previously determined high ANA score and one with a low ANA score were used on the same slide to confirm the sensitivity and specificity of the test during each scoring. ANA scores were evaluated by two experienced Rheumatology specialists, unaware of the autoimmune phenotypes.

### **Histology and Immunohistochemistry of kidney lesions**



For mice, half of the kidney was isolated and fixed in histological 10% formalin solution fixative (Sigma-Aldrich) and embedded in paraffin. Three micrometer sections of the kidney tissue were cut, and images observed for various morphologic lesions after hematoxylin-eosin (H&E) staining were collected on an Olympus BX51 microscope.

Renal or spleen tissues were embedded in Tissue-Tec OCT medium, frozen in liquid nitrogen, and stored at -80°C until sectioning. Renal slides were stained with goat anti-mouse IgG (1:150 dilutions; Abcam, Cambridge, UK) or goat anti-mouse complement C3 (1:150 dilutions; Abcam, Cambridge, UK). Images were acquired on Zeiss 880, processed, and analyzed using Zen (Carl Zeiss) software and fluorescence intensity was quantified using ImageJ software.

### **Measurement of autoantibodies, albumin, creatinine, and cytokines**

Serum levels of IgG anti-double stranded DNA (IgG anti-dsDNA; Alpha Diagnostic, Catalog 5110) and IL-17A (RayBiotech, Catalog ELM-IL17-1) were measured using commercial ELISA kit, according to the manufacturer's protocol. Serum BUN (StressMarq Biosciences, Catalog SKT-213-192) and creatinine (Abcam, Catalog ab65340) were measured according to the manufacturer's protocol. Urine mouse albumin was detected using the Mouse Albumin ELISA kit (Bethyl Laboratories, Catalogue E99-134) according to the manufacturer's instructions.

### **Neutrophil isolation**

Bone marrow neutrophils were isolated using a modified protocol of a Percoll-based density gradient as described before<sup>13</sup>. Briefly, femurs and tibiae were harvested from mice of different groups. Bone marrow was rinsed with a syringe filled with medium and collected in a tube, and single-cell suspensions were generated. Centrifuge the bone marrow suspension at  $250 \times g$  for 5 min at room temperature. Layer each dilution of Percoll (52%, 64%, 72%) onto the one beneath in a sterile 15 mL conical tube. Start with 2 ml of the 72% Percoll dilution, followed by 2 ml of the 64% dilution and then 2 ml of the 52% dilution, 2 mL cell

suspensions on the top using a 2 mL serological pipette. Centrifuge the gradient at 2000g for 30 min at room temperature. Next, carefully remove the first (top) and second cell layers (between the top and 52% and between 52% and 64% layers) and then remove the third (neutrophil) layer and transfer the cells to a clean 15 mL conical tube. Repeat this procedure with a clean transfer pipette until the third layer is entirely transferred, or the layers begin to mix. The neutrophils are ready to use in the following experiments.

### **NET formation**

BM isolated neutrophils were seeded onto  $\mu$ -Dish coated with poly-l-lysine (Sigma-Aldrich). Then neutrophils were incubated in RPMI-1640 supplemented with L-glutamine and 10% FBS. In experiments with either no stimulation or 100 nM PMA (Sigma-Aldrich), incubation was for 24 hours at 37°C. Cells were fixed with 4% Paraformaldehyde (PFA) and then blocked with 10% Bovine serum albumin (BSA); cells were not explicitly permeabilized. DNA was stained with Hoechst 33342 (Invitrogen). Protein staining was with rabbit polyclonal antibodies to neutrophil elastase (Abcam), signals were detected on Zeiss 880 confocal microscope (Carl Zeiss AG). At least 15 random fields were selected from each of the three independent experiments.

### **Phagocytosis assays**

The phagocytosis assay was performed similarly as described in Linyu et al<sup>12</sup>. BM-isolated neutrophils were cocultured with AC for 30 or 60 minutes at 37°C. Slides were then washed 3 times with sterile phosphate-buffered saline (PBS, Gibco) to remove any undigested AC and fixed using 4% paraformaldehyde prior to confocal microscopy. Neutrophils were labeled by CD11b (Bioscience).

### **Autophagic flux assay**

For autophagic flux assay, bone marrow-isolated neutrophils were stained by adding the Autophagy Tandem Sensor RFP-GFP-LC3B Kit (Invitrogen) to the cells in RPMI-1640

supplemented with L-glutamine and 10% FBS and cultured at 37°C ≥16h. Then neutrophils were stimulated by PMA for 4 hours. Slides were then washed three times with sterile phosphate-buffered saline (PBS, Gibco). Finally, slides were mounted with Hoechst 33342 and image the cells using the appropriate instrument filter sets for GFP and RFP detection on Zeiss 880 confocal microscope (Carl Zeiss AG). At least 15 random fields were selected from each of three independent experiments and were subjected to quantitative analyses of the mean fluorescence intensity (MFI) of puncta positive for GFP and RFP.

### **Quantitative real-time PCR of mitochondrial and chromosomal genes**

The assay is based on the previous reports of Lood C et al<sup>14</sup>. Briefly, bone marrow-isolated neutrophils ( $5 \times 10^5$  cells/ml), stimulated with PMA (Sigma), were cultured for 4 h. After addition of micrococcal nuclease (NEB) for 30 min at 37 °C, cell-free supernatants were incubated with anti-8-OHdG antibodies coupled to protein G beads (Santa Cruz) at 4 °C overnight. After centrifugation and extensive washing, non-8-OHdG DNA (supernatant) as well as 8-OHdG+ DNA (bound to antibody-bead complex), were treated with proteinase K (Thermo Scientific) for 4 h at 56 °C. 8-OHdG+ DNA and non-8-OHdG DNA were isolated by phenol chloroform extraction as described previously<sup>14</sup>, and were mixed with SYBR green master mix (Thermo Fisher) and primers (50 nM) for 16S (Forward, 5'-GGATAACAGCGCAATCCTA-3'; Reverse, 5'-GATTGCTCCGGTCTGAACTC-3') or 18S (Forward, 5'-GTAACCCGTTGAACCCATT-3'; Reverse, 5'-CCATCCAATCGGTAGTAGCG-3') at final volume of 20 ul, respectively. Activation of enzyme at 95°C for 15 min was followed by 40 cycles with 95°C for 15 s and 60°C for 60 s.

### **Participants and sample collection**

A total of 26 treatment-naïve, newly diagnosed SLE patients and 20 HCs were included in this study.

All SLE patients met at least 4 of the 11 American College of Rheumatology (ACR) criteria for the classification of SLE<sup>15</sup>. SLE activity was evaluated according to SLE Disease Activity

Index (SLEDAI) scores. Blood samples were collected from patients with SLE and from HCs, and cells were removed from plasma by centrifugation for 5 minutes at 2000 rpm at 20°C within 10 minutes. Following centrifugation, the supernatant plasma was harvested and stored at -80°C. Information about clinical symptoms, and physical examination were registered in a database when serum sampling was performed. This study was approved by the Ethical Committee of the First Affiliated Hospital of Nanjing Medical University, and all donors provided written informed consent.

### **Sample preparation and LC/MS analysis**

Aliquots of 100µl of serum and 100µl of internal standard were transferred to a LoBind microcentrifuge tube (Eppendorf) and vortexed for 30 s. For protein precipitation, 400µl and 1% formic acid methanol (Sigma) was added to precipitate the protein, vortexed at 2000 rpm for 3 minutes, centrifuged at 4°C for 5 minutes (12000 rpm), and the supernatant was transferred to a new tube. The supernatant was mixed with 300µl of 0.1% formic acid in Acetonitrile (Merck). The mixture was incubated at room temperature for 1 h. LC-MS/MS analysis were then performed on a SCIEX Exion LCTM 20 AD system connected a mass spectrometer AB Sciex 6500 QTRAP (AB SCIEX, Foster City, CA, USA).

For spermine, chromatographic separation was performed on an Acquity UPLC r HSS T3 column (1.8 µm; 2.1 mm~100 mm) (Waters, USA). The gradient employed was 0~2 min, 3% B; 2~4 min, 3~60% B; 4~6 min, 60~97% B; 6~8 min, 97% B; 8~8.1 min, 97~3% B, with the mobile phases being 0.5% formic acid in water (Solvent A) and 0.1% formic acid in Acetonitrile (Solvent B). The flow rate was 0.3 mL/min, the injection volume was 5 µL and the column temperature was set at 40 °C.

For the other polyamines (except spermine), chromatographic separation was performed on an Acquity UPLC BEH Amide column (1.7 µm; 2.1 mm~100 mm) (Waters, USA). The gradient employed was 0~2 min, 95% B; 2~10 min, 95~60% B; 10~14 min, 60% B; 14~14.01 min, 60~95% B; 14.01~16 min, 95% B, with the mobile phases being 100 mM

ammonium acetate (Solvent A) and acetonitrile (Solvent B). The flow rate was 0.3 mL/min, the injection volume was 2.5  $\mu$ l and the column temperature was set at 40  $^{\circ}$ C.

The triple quadrupole operated in the positive electrospray ionization mode (ESI+). Ion source settings were set as followed: ion source voltage floating of 4500 V, ion source temperature of 450 $^{\circ}$ C, curtain gas of 25 psi, nebulizer gas and auxiliary gas of 50 psi.

Multiple reaction monitoring (MRM) is used for scanning. Quantitative determination was performed using the multiple reaction monitoring (MRM) mode, and the transitions for each compound are detailed in online supplementary table 9.

### **Plasma cell-free DNA concentration**

The cell-free DNA levels of plasma samples were measured by Quant-iT<sup>TM</sup> PicoGreen<sup>®</sup> dsDNA Reagent and Kits (Invitrogen) according to the manufacturer's instructions, with slight modifications. Briefly, 3  $\mu$ l of patient's plasma was added into each micro-well containing 100  $\mu$ l of TE buffer (10 mM Tris-HCl, 1 mM EDTA, pH 7.5) followed by addition of 100  $\mu$ l of PicoGreen working solution. Reaction mixture was dark incubated for 5 min and fluorescence was measured (at 485 nm excitation, 535 nm emission wavelengths) using a fluorescence microplate reader (Perkin Elmer Wallac 1420). Each sample was performed in duplicate. The absolute concentration of the cell-free DNA was calculated by using a low-range standard curve, which consisted of five different dilutions of genomic DNA (Applied Biosystems, cat #4312660, #360486; 250, 1000, 2500, 5000 and 10,000 pg/ $\mu$ l).

### **Statistical analysis.**

GraphPad Prism 9 software (GraphPad Software, San Diego, CA) was used to assess statistical significance by applying two-tailed unpaired t-tests and two-tailed Mann-Whitney tests as described in the figure legends. Correlations between polyamine metabolites and SLE disease activities were evaluated using partial correlation. *P* values < 0.05 were considered statistically significant.

## Supplementary figure 1

### Genomic map, exon structure, exome sequencing coverage and Sanger sequencing approach of *SATI*.

(A) Genomic map, exon structure of *SATI*. Below the ideogram of the human X chromosome a genomic region of *SATI* located at Xp22.11 is shown. This figure was adapted from the UCSC Genome Browser.

(B) Exon structure of different transcripts of *SATI* and their mean expression levels across all tissues. Transcript expression was calculated from GTEx v7 RNA-Seq data. \*Denotes the Ensemble canonical transcript of *SATI* and RefSeq transcript NM\_002970 of *SATI* from NCBI annotations.

(C) Sequencing depth (per base) at *SATI* and locations of known loss-of-function (LOF) *SATI* variants are depicted. Most known LOFs located in coding regions not present in the highly expressed transcripts in the gnomAD population database, except p.Asp99\_Tyr100insTer variant that has a minor allele frequency of 0.0005%, 1/183495 individuals who is an African-American. Each exon of *SATI* is well sequenced in gnomAD with an average 50X sequencing depth. This figure was adapted from the gnomAD browser.

(D) PCR amplification of *SATI* for Sanger sequencing. The 2-kb coding region of *SATI* was amplified by two PCR reactions (PCR products P1 and P2) for bidirectional sequencing.

## **Supplementary figure 2**

### **Evolutionary conservation and computational prediction for functional impact of p.Asp40Tyr and p.Glu92Leufs\*6.**

(A) Alignments of multiple vertebrate species at p.Asp40Tyr and p.Glu92Leufs\*6. This figure was adapted from the UCSC Genome Browser.

(B) Assessment of the functional impact of p.Asp40Tyr. The missense variant p.Asp40Tyr is predicted to be deleterious using Sorting Intolerant From Tolerant (SIFT), Polymorphism Phenotyping v2 (PolyPhen-2), Functional Analysis through Hidden Markov Models (FATHMM), LRT, Mutation Taster, Mutation Assessor, PROVEAN, and MetaSVM.

### Supplementary figure 3

#### Sanger sequencing chromatograms depicting the aberrant transcripts produced by variant c. 118G>T (p.Asp40Tyr) in family #1

(A) A single wild-type Asp40 containing transcript, which consists of pET01 exon V1, exon 2, exon 3 and pET01 exon V2, is spliced as expected. The three isoforms of variant Tyr40 containing transcripts include Transcript 1 that shows complete skipping of exon 2, Transcript 2 that shows normally splicing with p.Asp40Tyr containing, and Transcript 3 that shows intron 2 retained, includes pET01 exon V1, exon 2, intron 2, exon 3, and pET01 exon V2. c.118G>T (p.Asp40Tyr) variant is indicated by a red line. Vector exons, V1 and V2, are depicted as black boxes, intron 2 of SAT1 is in orange, and exons 2 and 3 of SAT1 are in gray. TAG stop codon is underlined (star symbol).

(B) Sanger sequencing-verified transcripts 1, 2 and 3 represent the skipped exon 2, normally sliced, and the intron 2 retained transcript from Tyr40-containing transfected construct indicated by red dashed lines. Tyr40 variant is indicated by a red line. Vector exons, V1 and V2, are depicted as black boxes, intron 2 of *SATI* is in orange, and exons 2 and 3 of *SATI* are in gray. Vector exon-specific primers are indicated by black arrows.

(C) Schematic representation of protein models of WT and p.Asp40Tyr *SATI* transcripts. N<sup>1</sup>-acetyltransferase domain of SSAT1 protein is shown in blue; Red star symbol depicts the termination code (TAG); Missense and insertion mutations are shown in the schematics in orange.



#### Supplementary figure 4

#### CRISPR-Cas9 mediated generation of a *Sat1*<sup>p.Glu92Leufs\*6</sup> KI C57BL/6J mouse model.

- (A) The design strategy, and sequences of guide RNA and ssODN.
- (B) Chromosome locations and genomic positions of the gene editing target and two predicted potential off-target sites that were not detected in the founders.
- (C) Breeding schemes of wild type (WT) and knock in (KI) male littermates, as well as heterozygous (HET) and KI female littermates for experiments. Blue box denotes male WT and KI littermates; Red box denotes female WT, HET, and KI mice.
- (D) Sanger sequencing data of founders and genotype results of WT, HET and KI mice.
- (E) Diagrammatic timeline representation of either spontaneous or apoptotic cell-induced lupus-like disease development in WT or *Sat1*<sup>p.Glu92Leufs\*6</sup> KI littermates. WT, wild type; KI, knock in. AC, Apoptotic cells.

## Supplementary figure 5

### Effect of p.Glu92Leufs\*6 variant on expression of *Sat1* and SSAT1 and activity of SSAT1 activity.

(A and B) Relative expression levels of *Sat1* mRNA by RT-qPCR (A) and SSAT1 protein (B) by Western blot using splenocytes from 10-week-old male WT and KI littermates with or without DENSpem (a polyamine analog) stimulation. Data are mean  $\pm$  SD. Mann-Whiney U test.

(C) Detection of the SSAT1 activity in liver cell homogenates from 10-week-old male WT and KI littermates by colorimetric assay. N1, N11-diethylnorspermine (DENSpem), 10 $\mu$ M for 24 hours; WT, wild type; KI, knock in; M, marker. Data are mean  $\pm$  SD. Mann-Whiney U test.

## Supplementary figure 6

### Phenotype of *Sat1*<sup>p.Glu92Leufs\*6</sup> male littermates.

- (A and B) Representative image of spleens (A), body weights, and changes in body weights (B) at different ages of male WT and KI littermates. Open circle: WT; closed circle: KI.
- (C) Representative image of serum ANA staining of Hep2 cells and ANA Scores from 5 to 52-week-old male WT and KI littermates. ANA Scores were blindly evaluated by two Rheumatology specialists. Bar: 50 $\mu$ m.
- (D) Serum IL-17A levels in sera of 5 to 52-week-old male WT and KI littermates.
- (E) Relative expression levels of type I interferon stimulated genes (ISGs) in splenocytes of 5- to 52-week-old WT and KI male littermates. Black: 5-wk-old; Purple: 10-wk-old; Green: PBS-treated 20-wk-old; Red: AC-treated 20-wk-old groups. Blue: 52-week-old. PBS, phosphate buffer saline; AC, apoptotic cell. Data are mean  $\pm$  SD. Mann-Whiney U test.

## Supplementary figure 7

### Phenotype comparison among female WT, HET and KI mice injected with either PBS or apoptotic cells.

(A and B) Representative image of spleen and spleen index (A), and body weight change (B) in 20-week-old WT, heterozygote (HET) and KI female mice. Open circle, WT; Semi-solid circle, HET; Closed circle: KI; black: PBS treated 20-wk-old; Red: AC treated 20-wk-old groups. \* Compared with AC-HET group. Data are mean  $\pm$  SD. Mann-Whiney U test.

(C to E) Proteinuria (C), representative image of hematoxylin-eosin staining of kidney section (D), calculated type I IFN scores (E) in 20-week-old female WT, HET, and KI mice. Bar: 50 $\mu$ m.

(F) Pearson correlation of IFN scores with levels of proteinuria, serum anti-dsDNA and blood urea nitrogen (BUN) in splenocytes of 20-week-old KI mice treated with PBS or AC.

(G) Relative expression levels of ISGs in splenocytes of 20-week-old WT\* and KI female mice. ISGs, IFN-simulated genes. Green: PBS-treated 20-wk-old; Red: AC-treated 20-wk-old groups. \* Denotes WT female mice were chosen from other cages of similar dates of birth with the KI female mice.

(H) Levels of IgG, anti-dsDNA, and BUN in serum samples from 20-week-old WT and KI female mice. Data are mean  $\pm$  SD. Mann-Whiney U test.

## Supplementary figure 8

### Genotypic and sex differences in responses to AC treatment between *Sat1*<sup>p.Glu92Leufs\*6</sup> male and female mice.

(A) Representative image of hematoxylin-eosin-stained kidney sections in 20-week-old male and female WT and KI mice treated with either PBS or apoptotic cells. Bar: 50µm.

(B to G) Levels of proteinuria, IFN-Score (B), serum levels of BUN, IgG anti-dsDNA and IL-17A (C) in spleen cells from 20-week-old WT and KI male and female mice.

Frequencies of plasmacytoid dendritic cells (pDC), macrophage cells (D), proportions of Foxp3-related subsets, including CD4<sup>+</sup>Foxp3<sup>+</sup> T, CD4<sup>+</sup>Foxp3<sup>+</sup>CD25<sup>+</sup> Treg,

CD4<sup>+</sup>Foxp3<sup>+</sup>CXCR5<sup>++</sup>PD-1<sup>++</sup> Tfr cells, CD4<sup>+</sup>Foxp3<sup>-</sup>CXCR5<sup>-</sup>PD-1<sup>++</sup> Tph, CD4<sup>+</sup>Foxp3<sup>-</sup>

CXCR5<sup>++</sup>PD-1<sup>++</sup> Tfh cells, and Tfh/Tfr ratio (E), ANA<sup>+</sup> autoreactive B cell subsets, and

CD19<sup>+</sup>CD11C<sup>+</sup>CD21<sup>+</sup> Age-associated B cells (F), CD19<sup>+</sup>CD23<sup>low</sup>CD21<sup>high</sup> marginal zone

(MZ), CD19<sup>+</sup>CD23<sup>hi</sup>CD21<sup>int</sup> Follicular, CD19<sup>+</sup>CD95<sup>hi</sup>GL7<sup>hi</sup> Germinal center (GC),

CD19<sup>+</sup>CD23<sup>hi</sup>CD21<sup>int</sup> plasmablast B cells, plasma cells (G), in splenocytes of 20-week-old

male and female mice treated with PBS or AC. PBS, phosphate buffer saline; AC, apoptotic cells; Blue: male littermates; Red: female mice; Circle, WT; Solid dot, KI. Data are mean ±

SD. *P*-values in green for sex differences of the same genotypes; *P*-values in black for

genotypic differences. Mann-Whiney U test.

## Supplemental figure 9

### **Perturbed development of Foxp3-related T cell subsets in naïve 5- to 10-week-old male KI mice.**

(A and B) Representative gating strategy and proportion of T cell subsets in thymocytes from 5 or 10-wk-old male WT and KI littermates, including CD4<sup>+</sup>CD25<sup>+</sup> T cells and CD4<sup>+</sup>CD25<sup>+</sup>Foxp3<sup>+</sup> T cells. Mann-Whiney U test (left). Unpaired *t*-test (right). Data presented as mean ± SD.

(C) Gating strategy and percentage of splenic CD4<sup>+</sup> T cell subsets including CD4<sup>+</sup>Foxp3<sup>+</sup> cells, CD4<sup>+</sup>CD25<sup>+</sup>Foxp3<sup>+</sup> T regulatory cells (Treg), CD4<sup>+</sup> Foxp3<sup>+</sup>CXCR5<sup>+</sup>PD1<sup>+</sup> T follicular regulatory cells (Tfr), and CXCR5<sup>-</sup>PD-1<sup>+</sup> T peripheral helper (Tph) cells, CXCR5<sup>+</sup>PD-1<sup>+</sup> T follicular helper cells (Tfh) from CD4<sup>+</sup>Foxp3<sup>-</sup> cells, and Tfh/Tfr ratios in 5- to 20-week-old KI and WT male mice. Open circle, WT mice; closed circle, KI mice. Mann-Whiney U test. Data presented as mean ± SD.

**Supplementary figure 10**

**Expression of SAT1 mainly enriched in Thio-induced peritoneal neutrophils of C57/BL6J mice and human neutrophils.**

These figures were adapted from ImmGen (A) and Human Protein Atlas (B) database.

**Supplementary table 1. Variants identified by whole exome sequencing in two multiplex families.**

| <b>Location</b>                              | <b>Number of variants</b> |
|----------------------------------------------|---------------------------|
| Exonic                                       | 59,294                    |
| Splicing (within 2bp of a splicing junction) | 413                       |
| 5'/3' UTR                                    | 71,411                    |
| Downstream / upstream (within 1kb)           | 18,412                    |
| Intronic                                     | 283,128                   |
| Non-coding RNA                               | 63,348                    |
| Intergenic                                   | 301,530                   |
|                                              | 797,536                   |



**Supplementary table 2. Clinical features of 562 SLE patients enriched in index cases of multiplex pedigrees, male lupus and pediatric SLE patients.**

|                                     | <b>Multiplex family</b><br>n=65 | <b>Sporadic pediatric<br/>Lupus</b><br>n=211 | <b>Sporadic adult<br/>Lupus</b><br>n=286 |
|-------------------------------------|---------------------------------|----------------------------------------------|------------------------------------------|
| <b>Age of onset, mean (range)</b>   | 20.4 ± 13.3 (5-48)              | 13.7 ± 3.4 (1-18)                            | 36.2 ± 11.6(19-72)                       |
| <b>Male, n (%)</b>                  | 52 (80)                         | 107 (51)                                     | 263 (92)                                 |
| <b>Disease manifestation, n (%)</b> |                                 |                                              |                                          |
| Malar rash                          | 47 (68)                         | 108 (51)                                     | 94 (33)                                  |
| Discoid rash                        | 12 (17)                         | 21 (10)                                      | 57 (20)                                  |
| Photosensitivity                    | 34 (49)                         | 68 (32)                                      | 112 (39)                                 |
| Oral ulcer                          | 21 (30)                         | 57 (27)                                      | 54 (19)                                  |
| Arthritis                           | 55 (79)                         | 137 (65)                                     | 180 (63)                                 |
| Serositis                           | 26 (38)                         | 61 (29)                                      | 114 (40)                                 |
| <b>Renal disorder</b>               | 40 (58)                         | 148 (70)                                     | 132 (46)                                 |
| Proteinuria                         | 38 (55)                         | 106 (50)                                     | 126 (44)                                 |
| Cellular casts                      | 17 (24)                         | 30 (14)                                      | 46 (16)                                  |
| <b>Hematologic disorder</b>         | 43 (63)                         | 97 (46)                                      | 163 (57)                                 |
| Anemia                              | 17 (24)                         | 25 (12)                                      | 23 (8)                                   |
| Thrombocytopenia                    | 19 (28)                         | 34 (16)                                      | 57 (20)                                  |
| <b>Immunologic disorder</b>         | 57 (82)                         | 192 (91)                                     | 255 (89)                                 |
| Anti-double stranded DNA            | 45 (65)                         | 167 (79)                                     | 177 (62)                                 |
| Anti-Smith                          | 11 (16)                         | 38 (18)                                      | 77 (27)                                  |
| Antinuclear antibody                | 68 (99)                         | 196 (93)                                     | 283 (99)                                 |
| Anti-Cardiolipin                    | 19 (28)                         | 89 (42)                                      | 160 (56)                                 |

**Supplementary table 3. Ethnicity and age of onset characteristics of 562 SLE patients.**

| Ethnicity         | Numbers | Percentage |
|-------------------|---------|------------|
| European-American | 245     | 44%        |
| African-American  | 125     | 22%        |
| Hispanic-American | 80      | 14%        |
| Asian-American    | 68      | 12%        |
| American Indian   | 7       | 1%         |
| Unknown           | 37      | 7%         |

| Age of onset (years) | Numbers | Percentage |
|----------------------|---------|------------|
| 1-5                  | 5       | 0.9%       |
| 6-10                 | 35      | 6.2%       |
| 11-15                | 118     | 21.0%      |
| 16-18                | 97      | 17.3%      |
| 19-72                | 300     | 53.4%      |
| Unknown              | 7       | 1.2%       |

**Supplementary table 4. Minor Allele Frequencies (MAF) of 12 common variants and 3 additional rare variants of *SAT1* identified from 562 SLE patients in comparison to those from TOPMED and gnomAD database.**

| SNP            | Location | TOPMED        |       | gnomAD        |       | Current Study |       |
|----------------|----------|---------------|-------|---------------|-------|---------------|-------|
|                |          | Allele Number | MAF   | Allele Number | MAF   | Allele Number | MAF   |
| X-23783180-T-C | 5'UTR    | -             | -     | -             | -     | 1             | 0.18% |
| X-23783714-T-C | Intron 2 | -             | -     | -             | -     | 1             | 0.18% |
| X-23785605-T-C | Intron 5 | -             | -     | -             | -     | 1             | 0.18% |
| rs113458958    | 5'UTR    | 2159          | 1.72% | 260           | 1.22% | 4             | 0.71% |
| rs11550721     | 5'UTR    | 19850         | 15.8% | 3841          | 18.2% | 50            | 8.90% |
| rs757525953    | 3'UTR    | 245           | 0.20% | 18            | 0.08% | 5             | 0.89% |
| rs3764885      | Intron 1 | 36609         | 29.2% | 5649          | 27.1% | 370           | 65.8% |
| rs770974016    | Intron 1 | 263           | 0.21% | 41            | 0.19% | 2             | 0.36% |
| rs1569213511   | Intron 1 | -             | -     | 5             | 0.01% | 1             | 0.18% |
| rs3764884      | Intron 1 | 42802         | 34.1% | 5787          | 30.3% | 351           | 62.5% |
| rs191762819    | Intron 2 | 244           | 0.19% | 285           | 0.16% | 1             | 0.18% |
| rs140890109    | Intron 4 | 1060          | 0.84% | 367           | 0.21% | 6             | 1.07% |
| rs144320087    | Intron 5 | 302           | 0.24% | 51            | 0.23% | 3             | 0.53% |
| rs145980431    | Exon1    | 40            | 0.03% | 51            | 0.03% | 1             | 0.18% |
| rs139915283    | Exon1    | 40            | 0.03% | 50            | 0.03% | 1             | 0.18% |

**Supplementary table 5. No robust evidence for functions in 12 common *SAT1* variants based on HaploReg v4 and Regulome database.**

| Variant      | Ref   | Alt | HaploReg V4                   |                               |       |                                       |                                  | Regulome          |
|--------------|-------|-----|-------------------------------|-------------------------------|-------|---------------------------------------|----------------------------------|-------------------|
|              |       |     | No. of Promoter histone marks | No. of Enhancer histone marks | DNase | No. of protein bound by Chip (ENCODE) | No. of regulatory motifs altered | Regulome DB Score |
| rs113458958  | G     | A   | 24                            | 1                             | 53    | 29                                    | 0                                | 4                 |
| rs11550721   | C     | T   | 24                            | 1                             | 53    | 29                                    | 0                                | 4                 |
| rs145980431  | G     | A   | 24                            | 0                             | 43    | 6                                     | 4                                | 4                 |
| rs139915283  | C     | A   | 24                            | 0                             | 43    | 6                                     | 3                                | 3a                |
| rs3764885    | A     | G   | 24                            | 0                             | 37    | 5                                     | 5                                | 4                 |
| rs3764884    | G     | C   | 24                            | 0                             | 10    | 1                                     | 4                                | 4                 |
| rs191762819  | G     | C   | 24                            | 0                             | 24    | 2                                     | 1                                | 4                 |
| rs140890109  | T     | C   | 12                            | 7                             | 2     | 0                                     | 2                                | 4                 |
| rs144320087  | G     | A   | 9                             | 9                             | 2     | 0                                     | 9                                | 5                 |
| rs757525953  | TTGT  | T   | NA                            | NA                            | NA    | NA                                    | NA                               | 4                 |
| rs770974016  | C     | T   | NA                            | NA                            | NA    | NA                                    | NA                               | 2b                |
| rs1569213511 | CCCCG | C   | NA                            | NA                            | NA    | NA                                    | NA                               | 3a                |

Abbreviation: NA denotes not available.

Regulome:

1a~f Likely to affect binding and linked to expression of a gene target

2a~c Likely to affect binding

3a~b Less likely to affect binding

4~6 Minimal binding evidence

**Supplementary table 6. Demographic, and clinical characteristics of the treatment naive SLE patients.**

| Patients | Age | Gender | Clinical manifestations                                                                     | SLEDAI-2K |
|----------|-----|--------|---------------------------------------------------------------------------------------------|-----------|
| #1       | 31  | F      | Proteinuria/ Rash / Low Complement                                                          | 6         |
| #2       | 22  | F      | Vasculitis/ Proteinuria/ Low Complement                                                     | 10        |
| #3       | 22  | F      | Pleurisy/ Low Complement/ Thrombocytopenia                                                  | 7         |
| #4       | 32  | F      | Hematuria/ Proteinuria/ Pericarditis/ Low Complement                                        | 12        |
| #5       | 18  | F      | Rash/ Low Complement/ High titers of dsDNA                                                  | 6         |
| #6       | 30  | F      | Hematuria/ Proteinuria/ Pyuria/ Low Complement                                              | 14        |
| #7       | 21  | F      | Rash/ Low Complement/ High titer of dsDNA                                                   | 6         |
| #8       | 21  | F      | Hematuria/ Proteinuria/ Rash/ Alopecia/ Pleurisy/ Pericarditis/ Low Complement<br>/ Fever   | 19        |
| #9       | 29  | F      | Rash/ Alopecia/ Low Complement/ High titers of dsDNA/ Fever/ Leukopenia                     | 10        |
| #10      | 26  | F      | Hematuria/ Proteinuria/ Low Complement                                                      | 12        |
| #11      | 36  | F      | Arthritis/ Proteinuria/ Alopecia/ Low Complement/ High titers of dsDNA/<br>Thrombocytopenia | 15        |
| #12      | 30  | M      | Arthritis/ Rash/ Low Complement                                                             | 8         |
| #13      | 25  | F      | Proteinuria/ Low Complement                                                                 | 6         |
| #14      | 21  | F      | Proteinuria/ Low Complement                                                                 | 6         |
| #15      | 18  | F      | Hematuria/ Proteinuria/ Low Complement                                                      | 10        |

|     |    |   |                                                                                             |    |
|-----|----|---|---------------------------------------------------------------------------------------------|----|
| #16 | 22 | F | Proteinuria/ Low Complement                                                                 | 6  |
| #17 | 24 | F | Low Complement/ High titers of dsDNA                                                        | 4  |
| #18 | 24 | F | Proteinuria/ Low Complement                                                                 | 4  |
| #19 | 28 | F | Proteinuria/ High titers of dsDNA / Low Complement                                          | 8  |
| #20 | 33 | M | Proteinuria/ Rash / Alopecia / Pleurisy / Low Complement / Thrombocytopenia /<br>Leukopenia | 14 |
| #21 | 27 | F | Rash / Low Complement / High titers of dsDNA                                                | 6  |
| #22 | 33 | F | Proteinuria/ Low Complement                                                                 | 6  |
| #23 | 15 | F | Proteinuria/ Low Complement/ High titers of dsDNA                                           | 8  |
| #24 | 19 | F | Rash / Low Complement                                                                       | 4  |
| #25 | 15 | F | Hematuria/ Rash / Low Complement                                                            | 8  |
| #26 | 23 | F | Proteinuria/ Low Complement/ High titers of dsDNA                                           | 8  |

---

**Supplementary table 7. Gender, ethnicity, and age of 26 SLE patients and 20 healthy controls.**

|                   | SLE (n=26)   | Control (n=20) | <i>P</i> value |
|-------------------|--------------|----------------|----------------|
| Female, n (%)     | 24 (92.6)    | 19 (95.0)      | 0.7139         |
| Age, mean (range) | 24.8 (15-33) | 23.3 (14-32)   | 0.3858         |
| Ancestry, n (%)   |              |                |                |
| Chinese-Han       | 26 (100)     | 20 (100)       | 1              |

**Supplementary table 8. Correlation between disease activity and plasma polyamine levels in patients with SLE. Correlation coefficients and *P* values were depicted.**

|                          | SPD           |              | SPM           |              | N'PUT         |              | N'SPD    |          | N'SPM         |              | L-ORN    |          | L-ARG         |              | SAM           |              |
|--------------------------|---------------|--------------|---------------|--------------|---------------|--------------|----------|----------|---------------|--------------|----------|----------|---------------|--------------|---------------|--------------|
|                          | <i>r</i>      | <i>p</i>     | <i>r</i>      | <i>p</i>     | <i>r</i>      | <i>p</i>     | <i>r</i> | <i>p</i> | <i>r</i>      | <i>p</i>     | <i>r</i> | <i>p</i> | <i>r</i>      | <i>p</i>     | <i>r</i>      | <i>p</i>     |
| SLEDAI                   | -0.348        | 0.145        | -0.314        | 0.191        | 0.416         | 0.069        | -0.008   | 0.975    | -0.384        | 0.094        | -0.022   | 0.928    | 0.420         | 0.065        | <b>0.535</b>  | <b>0.015</b> |
| PU (mg/24h)              | -0.146        | 0.605        | -0.117        | 0.666        | 0.073         | 0.788        | -0.180   | 0.505    | -0.056        | 0.836        | -0.031   | 0.909    | 0.010         | 0.972        | -0.249        | 0.353        |
| Anti-dsDNA (RU/ml)       | <b>-0.424</b> | <b>0.044</b> | <b>-0.463</b> | <b>0.023</b> | 0.065         | 0.762        | 0.096    | 0.656    | -0.243        | 0.253        | 0.182    | 0.395    | 0.099         | 0.647        | 0.398         | 0.054        |
| Cf DNA (ng/ml)           | <b>-0.575</b> | <b>0.013</b> | -0.391        | 0.109        | 0.121         | 0.621        | 0.093    | 0.706    | <b>-0.522</b> | <b>0.022</b> | -0.303   | 0.208    | 0.068         | 0.782        | -0.192        | 0.432        |
| BUN (mmol/L)             | 0.203         | 0.390        | 0.222         | 0.346        | <b>-0.598</b> | <b>0.004</b> | -0.050   | 0.829    | 0.258         | 0.259        | -0.051   | 0.825    | <b>-0.551</b> | <b>0.010</b> | -0.319        | 0.159        |
| Cr (μmol/L)              | -0.259        | 0.270        | -0.181        | 0.445        | 0.166         | 0.472        | -0.022   | 0.926    | -0.180        | 0.434        | 0.208    | 0.367    | 0.227         | 0.323        | 0.423         | 0.056        |
| HB (g/L)                 | -0.412        | 0.080        | -0.371        | 0.117        | 0.407         | 0.075        | -0.105   | 0.658    | <b>-0.469</b> | <b>0.037</b> | -0.224   | 0.344    | 0.354         | 0.126        | <b>0.494</b>  | <b>0.027</b> |
| PLT (10 <sup>9</sup> /L) | -0.252        | 0.299        | -0.066        | 0.789        | 0.166         | 0.485        | 0.110    | 0.644    | -0.207        | 0.381        | -0.277   | 0.237    | 0.149         | 0.530        | 0.171         | 0.471        |
| N (10 <sup>9</sup> /L)   | -0.377        | 0.069        | <b>-0.662</b> | <b>0.000</b> | -0.056        | 0.792        | 0.119    | 0.572    | -0.307        | 0.135        | -0.141   | 0.501    | -0.108        | 0.608        | 0.108         | 0.609        |
| IgG (g/L)                | -0.295        | 0.206        | -0.162        | 0.495        | <b>0.435</b>  | <b>0.049</b> | 0.016    | 0.945    | -0.371        | 0.098        | -0.226   | 0.326    | 0.418         | 0.059        | <b>0.574</b>  | <b>0.007</b> |
| IgA (g/L)                | 0.407         | 0.093        | 0.319         | 0.197        | -0.176        | 0.472        | 0.028    | 0.910    | 0.358         | 0.132        | 0.171    | 0.485    | -0.119        | 0.627        | -0.252        | 0.298        |
| IgM (g/L)                | 0.181         | 0.445        | 0.203         | 0.391        | -0.298        | 0.190        | 0.317    | 0.162    | 0.237         | 0.300        | 0.020    | 0.933    | -0.260        | 0.255        | -0.235        | 0.305        |
| C3 (g/L)                 | -0.350        | 0.130        | -0.369        | 0.110        | 0.317         | 0.161        | -0.011   | 0.961    | -0.343        | 0.128        | -0.159   | 0.491    | 0.271         | 0.235        | 0.203         | 0.377        |
| C4 (g/L)                 | 0.280         | 0.233        | 0.135         | 0.569        | 0.016         | 0.946        | 0.153    | 0.507    | 0.303         | 0.182        | 0.058    | 0.805    | 0.044         | 0.851        | <b>-0.452</b> | <b>0.040</b> |
| CD3+CD4+ (%)             | 0.268         | 0.299        | 0.140         | 0.593        | 0.132         | 0.603        | -0.077   | 0.760    | 0.283         | 0.255        | 0.039    | 0.878    | 0.108         | 0.670        | -0.454        | 0.058        |
| CD3+CD8+ (%)             | 0.434         | 0.093        | 0.190         | 0.481        | 0.101         | 0.701        | -0.099   | 0.707    | 0.321         | 0.209        | 0.072    | 0.783    | 0.113         | 0.667        | 0.226         | 0.384        |
| CD19+ (%)                | 0.108         | 0.690        | 0.220         | 0.413        | -0.409        | 0.103        | 0.327    | 0.201    | 0.166         | 0.525        | 0.078    | 0.765    | -0.341        | 0.180        | -0.431        | 0.085        |
| CD4+Foxp3+ (%)           | <b>0.475</b>  | <b>0.022</b> | <b>0.597</b>  | <b>0.003</b> | -0.222        | 0.298        | -0.307   | 0.144    | <b>0.451</b>  | <b>0.027</b> | 0.170    | 0.426    | -0.281        | 0.183        | -0.352        | 0.092        |
| Tfh (%)                  | <b>0.525</b>  | <b>0.037</b> | 0.333         | 0.208        | -0.151        | 0.564        | 0.083    | 0.752    | <b>0.501</b>  | <b>0.040</b> | 0.141    | 0.589    | -0.128        | 0.624        | -0.370        | 0.143        |
| Tph (%)                  | -0.361        | 0.170        | -0.369        | 0.145        | 0.055         | 0.835        | 0.420    | 0.093    | -0.189        | 0.467        | 0.358    | 0.158    | 0.165         | 0.528        | <b>0.528</b>  | <b>0.029</b> |

Abbreviations: SLE: systemic lupus erythematosus; SLEDAI: Systemic Lupus Erythematosus Disease Activity Index; PU: Proteinuria; Anti-dsDNA: Anti-double-stranded DNA; Cf DNA: cell-free DNA; BUN: blood urea nitrogen; Cr: Creatinine; HB: Hemoglobin; PLT: Platelet; N: neutrophil; IgG: Immunoglobulin G; IgA: Immunoglobulin A; IgM: Immunoglobulin M; C3: Complement 3; C4: Complement 4; Tfh: T follicular helper; Tph: T Peripheral



Helper; SPD, Spermidine; SPM, Spermine; N<sup>1</sup>PUT, N1-acetylputrescine; N<sup>1</sup>SPD, N1-acetylspermidine; N<sup>1</sup>SPM, N-acetylspermine; L-ORN, L-ornithine; L-ARG, L-arginine; SAM S-adenosyl-L-methionine.

**Supplementary table 9. Selected multiple reaction monitoring, collision energy (CE), retention time, and declustering potential (DP) used for each analyte.**

| Analyte                          | Precursor Ion<br>( <i>m/z</i> ) | Product Ion ( <i>m/z</i> ) | Retention Time (min) | DP | CE   |
|----------------------------------|---------------------------------|----------------------------|----------------------|----|------|
| Putrescine                       | 89                              | 72.2                       | 10.3                 | 30 | 16   |
| spermidine                       | 146.1                           | 72.1                       | 12.7                 | 30 | 20   |
| spermine                         | 203.2                           | 129.2                      | 0.7                  | 30 | 18   |
| N <sup>1</sup> -acetylputrescine | 131.1                           | 72                         | 10.0                 | 30 | 22   |
| N <sup>1</sup> -acetylspermidine | 188.3                           | 171.1                      | 10.0                 | 30 | 15.6 |
| N <sup>1</sup> -acetylspermine   | 245.2                           | 100.1                      | 12.4                 | 30 | 27   |
| L-ornithine                      | 133.1                           | 70.1                       | 10.6                 | 30 | 22   |
| L-arginine                       | 175.1                           | 70                         | 10.5                 | 30 | 30   |
| S-adenosyl-L-methionine          | 399.1                           | 250.1                      | 10.7                 | 30 | 20   |

**Supplementary table 10. Antibodies used for flow cytometry.**

| Marker                                 | Color/Form at        | Host/Target                 | Isotype          | Clone      | Company           | Catalog      |
|----------------------------------------|----------------------|-----------------------------|------------------|------------|-------------------|--------------|
| CD19                                   | PE-Cy7               | Rat anti-Mouse              | IgG2a $\kappa$   | 6D5        | BioLegend         | 115519       |
| CD23                                   | Brilliant Violet 711 | Rat anti-Mouse              | IgG2a $\kappa$   | B3B4       | BD Biosciences    | 563987       |
| CD21                                   | DyLight 350          | Mouse anti-Mouse            | IgG1 $\kappa$    | BB6-11C9.6 | Novus Biologicals | NBP1-28245UV |
| CD5                                    | Brilliant Violet 421 | Rat anti-Mouse              | IgG2a $\kappa$   | 53-7.3     | BioLegend         | 100617       |
| CD11b                                  | FITC                 | Rat anti-Mouse              | IgG2b $\kappa$   | M1/70      | BioLegend         | 101205       |
| IgM                                    | APC                  | Rat anti-Mouse              | IgG2a $\kappa$   | RMM-1      | BioLegend         | 406509       |
| CD138                                  | PE                   | Rat anti-Mouse              | IgG2a $\kappa$   | 281-2      | BioLegend         | 142503       |
| CD45R (B220)                           | Brilliant Violet 650 | Rat anti-Mouse              | IgG2a $\kappa$   | RA3-6B2    | BD Biosciences    | 563893       |
| IgG2a                                  | Brilliant Violet 510 | Rat anti-Mouse              | IgG1 $\kappa$    | R19-15     | BD Biosciences    | 744531       |
| CD27                                   | APC-Cy7              | Armenian Hamster anti-Mouse | IgG              | LG.3A10    | BioLegend         | 124225       |
| CD95                                   | APC-R700             | Armenian Hamster anti-Mouse | IgG2 $\lambda$ 2 | Jo2        | BD Biosciences    | 565130       |
| IgD                                    | Brilliant Violet 786 | Rat anti-Mouse              | IgG2a $\kappa$   | 11-26c.2a  | BD Biosciences    | 563618       |
| T- and B-Cell Activation Antigen (GL7) | PerCP-Cy5.5          | Rat anti-Mouse              | IgM $\kappa$     | GL7        | BioLegend         | 144609       |
| CD3                                    | Brilliant Violet 421 | Rat anti-Mouse              | IgG2b $\kappa$   | 17A2       | BioLegend         | 100227       |
| CD19                                   | PE-Cy7               | Rat anti-Mouse              | IgG2a $\kappa$   | 6D5        | BioLegend         | 115519       |
| CD11b                                  | FITC                 | Rat anti-Mouse              | IgG2b $\kappa$   | M1/70      | BioLegend         | 101205       |
| CD11c                                  | Brilliant Violet 650 | Armenian Hamster anti-Mouse | IgG              | N418       | BioLegend         | 117339       |
| F4/80                                  | PE                   | Rat anti-Mouse              | IgG2a $\kappa$   | BM8        | BioLegend         | 123109       |
| Ly-6G                                  | APC                  | Rat anti-Mouse              | IgG2a $\kappa$   | 1A8        | BioLegend         | 127613       |

|           |                      |                  |         |            |                   |              |
|-----------|----------------------|------------------|---------|------------|-------------------|--------------|
| Ly-6C     | Brilliant Violet 605 | Rat anti-Mouse   | IgG2c κ | HK1.4      | BioLegend         | 128035       |
| CD56      | Brilliant Violet 786 | Rat anti-Mouse   | IgG2a κ | 809220     | Biosciences       | 748100       |
| CD45R     | APC-Cy7              | Rat anti-Mouse   | IgG2a κ | RA3-6B2    | BioLegend         | 103223       |
| MHC II    | BV 480               | Mouse anti-Mouse | IgG2a κ | 14-4-4S    | Biosciences       | 746291       |
| BST2      | Brilliant Violet 711 | Mouse anti-Mouse | IgG2b κ | 927        | Biosciences       | 747604       |
| CD4       | PerCP-Cy5.5          | Rat anti-Mouse   | IgG2b κ | GK1.5      | BioLegend         | 100433       |
| CD25      | Brilliant Violet 605 | Rat anti-Mouse   | IgG1 λ  | PC61       | BioLegend         | 102035       |
| FoxP3     | PE                   | Rat anti-Mouse   | IgG2b κ | MF-14      | BioLegend         | 126403       |
| CD185     | PE-Cy7               | Rat anti-Mouse   | IgG2b κ | L138D7     | BioLegend         | 145515       |
| PD-1      | APC                  | Rat anti-Mouse   | IgG2a κ | 29F.1A12   | BioLegend         | 135209       |
| IL-17A    | Brilliant Violet 421 | Rat anti-Mouse   | IgG1 κ  | TC11-18H10 | Biosciences       | 566286       |
| IL-4      | Alexa Fluor 488      | Rat anti-Mouse   | IgG1 κ  | 11B11      | BioLegend         | 504111       |
| IFN-gamma | Brilliant Violet 711 | Rat anti-Mouse   | IgG1 κ  | XMG1.2     | BioLegend         | 505835       |
| CD3       | Brilliant Violet 510 | Rat anti-Mouse   | IgG2b κ | 17A2       | BioLegend         | 100233       |
| CD8a      | Brilliant Violet 650 | Rat anti-Mouse   | IgG2a κ | 53-6.7     | BioLegend         | 100741       |
| Bcl-6     | APC-Cy7              | Mouse anti-Mouse | IgG1 κ  | K112-91    | Biosciences       | 563581       |
| CD183     | Alexa Fluor 700      | Rat anti-Mouse   | IgG2a   | 220803     | Novus Biologicals | FAB1685N-100 |
| CCR6      | Brilliant Violet 786 | Rat anti-Mouse   | IgG2a   | 140706     | Biosciences       | 740840       |

---

**Supplementary table 11. RT-PCR primer sequences for mice.**

| Gene name      | Forward Primer Sequence (5'-3') | Reverse Primer Sequence (5'-3') |
|----------------|---------------------------------|---------------------------------|
| <i>Foxp3</i>   | CAC CCA GGA AAG ACA GCA ACC     | GCA AGA GCT CTT GTC CAT TGA     |
| <i>Mx1</i>     | GACCATAGGGGTCTTGACCAA           | AGACTTGCTCTTTCTGAAAAGCC         |
| <i>Ifit1</i>   | AGCCTGGAGTGTGCTGAGAT            | TCTGGATTTAACCGGACAGC            |
| <i>Ifit44</i>  | CCAACTGACTGCTCGCAATA            | TAGGACCCAGCAGCAGAACT            |
| <i>Prkr</i>    | ACCGGCTCATAAGAGGGAAT            | GCATCCTAGGGAATGTCCAA            |
| <i>Oas1a</i>   | AGAGATGCTTCCAAGGTGCT            | CCTTGATGAACTCTCCCCGT            |
| <i>Sat1</i>    | TGCGACTGATCAAGGAACTG            | TATGTCCTCAGGGGTCCAG             |
| <i>16S</i>     | GGATAACAGCGCAATCCTA             | GATTGCTCCGGTCTGAACTC            |
| <i>18S</i>     | GTAACCCGTTGAACCCATT             | CCATCCAATCGGTAGTAGCG            |
| <i>β-actin</i> | GACGGCCAGGTCATCACTATTG          | AGGAAGGCTGGAAAAGAGCC            |

**Supplementary table 12. Primers for gDNA PCR amplification and direct Sanger sequencing of the human *SAT1* gene core promoter region and coding exons.**

|                                      | Forward Primer Sequence (5'–3') | Reverse Primer Sequence (5'–3') |
|--------------------------------------|---------------------------------|---------------------------------|
| 5' UTR and Exon 1~3 (Product 1)      | GCCTCATTGGATGAGAGGTC            | TTCGGCCTGTGTAGTCAGTG            |
| Exon 4~6 and 3' UTR (Product 2)      | GCCTGGACTGCACTCACATA            | GCCTGGACTGCACTCACATA            |
| Sequencing primer #1 (For Product 1) | ATCACCCCACTCTGGGAAAC            |                                 |
| Sequencing primer #2 (For Product 1) | ATCACCCCACTCTGGGAAAC            |                                 |
| Sequencing primer #3 (For Product 2) | CATTTCAGCCTGCTCTCAAG            |                                 |
| Sequencing primer #4 (For Product 2) | CATTTCAGCCTGCTCTCAAG            |                                 |

**Supplementary table 13. Mouse genotyping probe and Sanger sequencing primer sequences.**

|                 | Forward Primer Sequence (5'-3') | Reverse Primer Sequence (5'-3') |
|-----------------|---------------------------------|---------------------------------|
| Exon 4~6        | TAAGGAGGCAGTCCAGTTCC            | TCAAACATGCAACAACGTCA            |
| Probe           | GACATAGCATTGTTGGGTTCCG          | TCTGTAATCACTCATCACGAAGAA        |
| Reporter 1 (WT) | CTGTATCTTGAAGACTTC              |                                 |
| Reporter 2 (KI) | TGTATCTTTGAGGACTTC              |                                 |

**Supplementary table 14. Primers for sequencing and cloning of Minigene.**

|                         | Forward Primer Sequence (5'–3')     | Reverse Primer Sequence (5'–3') |
|-------------------------|-------------------------------------|---------------------------------|
| Human-Asp40Tyr-fragment | GATTCACGTCTTGAGGTCTCG               | GTGGTTCTACACAGCCGACA            |
| pET01 primers #1        | GGATTCTTCTACACACCC                  | TCCACCCAGCTCCAGTTG              |
| pET01 primers #2        | GCGAAGTGGAGGATCCACAAG               | ACCCGGATCCAGTTGTGCCA            |
| XhoI-Asp40Tyr           | CTGACTGACTCGAGgattcacgtcttgaggtctcg |                                 |
| BamHI-Asp40Tyr          | TCAGTCAGGGATCCgtggtctacacagccgaca   |                                 |



## References

1. Bolger, A.M., Lohse, M. & Usadel, B. Trimmomatic: a flexible trimmer for Illumina sequence data. *Bioinformatics* 30, 2114-2120 (2014).
2. Li, H. & Durbin, R. Fast and accurate short read alignment with Burrows–Wheeler transform. *bioinformatics* 25, 1754-1760 (2009).
3. McKenna, A., Hanna, M., Banks, E. *et al.* The Genome Analysis Toolkit: a MapReduce framework for analyzing next-generation DNA sequencing data. *Genome research* 20, 1297-1303 (2010).
4. Li, H., Handsaker, B., Wysoker, A. *et al.* The sequence alignment/map format and SAMtools. *Bioinformatics* 25, 2078-2079 (2009).
5. Wang, K., Li, M. & Hakonarson, H. ANNOVAR: functional annotation of genetic variants from high-throughput sequencing data. *Nucleic acids research* 38, e164-e164 (2010).
6. Harvey, S.E. & Cheng, C. Methods for characterization of alternative RNA splicing. in *Long Non-Coding RNAs* 229-241 (Springer, 2016).
7. Bewley, M.C., Graziano, V., Jiang, J. *et al.* Structures of wild-type and mutant human spermidine/spermine N1-acetyltransferase, a potential therapeutic drug target. *Proceedings of the National Academy of Sciences* 103, 2063-2068 (2006).
8. Quadros, R.M., Miura, H., Harms, D.W. *et al.* Easi-CRISPR: a robust method for one-step generation of mice carrying conditional and insertion alleles using long ssDNA donors and CRISPR ribonucleoproteins. *Genome biology* 18, 1-15 (2017).
9. Gordon, J.W. & Ruddle, F.H. [28] Gene transfer into mouse embryos: Production of transgenic mice by pronuclear injection. in *Methods in enzymology*, Vol. 101 411-433 (Elsevier, 1983).
10. Lin, H.-J., Lien, Y.-C. & Hsu, C.-H. A high-throughput colorimetric assay to characterize the enzyme kinetic and cellular activity of spermidine/spermine N1-acetyltransferase 1. *Analytical biochemistry* 407, 226-232 (2010).
11. Malkiel, S., Jeganathan, V., Wolfson, S. *et al.* Checkpoints for autoreactive B cells in the peripheral blood of lupus patients assessed by flow cytometry. *Arthritis & rheumatology* 68, 2210-2220 (2016).
12. Geng, L., Zhao, J., Deng, Y. *et al.* Human SLE variant NCF1-R90H promotes kidney damage and murine lupus through enhanced Tfh2 responses induced by defective efferocytosis of macrophages. *Annals of the Rheumatic Diseases* 81, 255-267 (2022).
13. Ubags, N.D. & Suratt, B.T. Isolation and Characterization of Mouse Neutrophils. in *Lung Innate Immunity and Inflammation* 45-57 (Springer, 2018).
14. Lood, C., Blanco, L.P., Purmalek, M.M. *et al.* Neutrophil extracellular traps enriched in oxidized mitochondrial DNA are interferogenic and contribute to lupus-like disease. *Nature medicine* 22, 146-153 (2016).
15. Hochberg, M.C. Updating the American College of Rheumatology revised criteria for the classification of systemic lupus erythematosus. *Arthritis and rheumatism* 40, 1725-1725 (1997).
